# Supplementary material for: De novo phytosterol synthesis in animals
Source: bioRxiv or medRxiv preprint supplement (doi:10.1101/2022.04.22.489198), 2022-05-17
Supplement: Supplementary file [file media-1.pdf]

## Supplementary materials

### **De novo phytosterol synthesis by an animal**

Dolma Michellod<sup>1</sup>, Tanja Bien<sup>2</sup>, Daniel Birgel<sup>3</sup>, Marlene Jensen<sup>5</sup>, Manuel Kleiner<sup>5</sup>, Sarah Fearn<sup>4</sup>, Caroline Zeidler<sup>1</sup>, Harald R Gruber-Vodicka<sup>1</sup>, Nicole Dubilier<sup>1,6\*</sup>, Manuel Liebeke<sup>1\*</sup>

<sup>1</sup> Max Planck Institute for Marine Microbiology, Celsiusstraße 1, 28359 Bremen, Germany

<sup>2</sup> Institute of Hygiene, University of Münster, Robert-Koch-Str. 41, 48149, Münster, Germany

<sup>3</sup> Institute for Geology, Center for Earth System Research and Sustainability, University of Hamburg, Bundesstraße 55, 20146 Hamburg, Germany

<sup>4</sup> Department of Materials, Imperial College London, London SW7 2AZ, United Kingdom

<sup>5</sup> Department of Plant and Microbial Biology, NC State University, Raleigh, NC 27695, United States

<sup>6</sup> MARUM, Center for Marine Environmental Sciences, University of Bremen, 28359 Bremen, Germany

\*corresponding authors: [mlichebe@mpi-bremen.de](mailto:mlichebe@mpi-bremen.de), [ndubilier@mpi-bremen.de](mailto:ndubilier@mpi-bremen.de)

# Supplementary Information

**Sitosterol is present in the environment of the gutless annelids in concentrations sufficient to sustain the growth of small sterol-auxotrophic invertebrates.**

Chemical analysis of pore water profiles collected in the vicinity of seagrass meadows, the habitat of many gutless annelids, revealed an irregular distribution of sterols. Some samples, such as those collected near *Posidonia oceanica* seagrass meadows off the island of Elba (Mediterranean), had cholesterol and sitosterol present in the nano- to micro-molar range (**Supplementary Figure 3**). Samples collected in Belize (Caribbean), in the vicinity of the seagrasses *Thalassia testudinum* and *Syringodium filiforme*, were devoid of detectable amounts of sitosterol or cholesterol. Seagrasses, like terrestrial plants, exude organic compounds into the substrate surrounding their roots, the rhizosphere (Sogin et al., 2021; Vives-Peris et al., 2020). The sterol profile of *P. oceanica* roots was composed of sitosterol (69%), stigmasterol (11%) and campesterol (20%). *P. oceanica* could thus be the origin of the sitosterol in the porewater, but cannot be the source of cholesterol as it was not present in its tissues. Cholesterol and sitosterol concentrations measured in the porewater environment (ranging from 25 nM to 3  $\mu$ M) are in the range of reported minimal dietary sterol requirements for small sterol-auxotrophic invertebrates (Carvalho et al., 2010; Lu et al., 1977). Furthermore, the sterols in the porewater could pass through the cuticle of the worm as it is permeable to substances up to 70 kDa (Dubilier et al., 2006).

**The isotopic signature of the sterols in the worms exclude an environmental origin.** Results from GC-IRMS with single metabolite resolution showed that the sitosterol present in seagrass tissue had  $\delta^{13}\text{C}$  values ranging from  $-21\text{‰}$  to  $-15\text{‰}$  (**Figure 1E**). These values are in accordance with bulk measures of isotopic composition for *P. oceanica* which range from  $-16.4\text{‰}$  to  $-8.3\text{‰}$  (Cooper & DeNiro, 1989; Jennings et al., 1997; Lepoint et al., 2004; McMillan et al., 1980; Pinnegar & Polunin, 2000; Vizzini et al., 2010), and also match values previously reported for sterols in other seagrasses (Canuel et al., 1997). Sterols from sediment porewater had  $\delta^{13}\text{C}$  values of  $-30\text{‰}$  to  $-26\text{‰}$  (**Figure 1E**), which are similar to previously reported ranges (Canuel et al., 1997; Dauby, 1989; Fry et al., 1983; Thayer et al., 1978) and

about 10 ‰ lower than the sterols from *P. oceanica*. This difference reflects the mixed sources of the sterols present in the sediment, most of which are likely planktonic in origin.

**The total sterol content of gutless annelids is comparable to the content of other worms.** Measurements of metabolites in single *Olavius algarvensis* worms with mass spectrometry revealed a total free sterol content of  $3.44 \pm 0.04 \mu\text{g}$  ( $n = 12$ ). Assuming an average wet weight per worm of 1 mg, sterols represent 0.34 % wet weight, a value similar to reported percentages for terrestrial and aquatic worms (Ballantine et al., 1978; McLaughlin, 1971a; Voogt, 1973a; Wilber & Bayors, 1947).

**SMTs in rotifers.** The rotifer sequences grouped together to form a sister group to unicellular eukaryotes SMT (**Figure 3**). The rotifers were isolated from different environments and had access to different food resources, which suggests that the recovered sequences were not a result of contamination. Sterol auxotrophy has been proposed for rotifers (Wacker & Martin-Creuzburg, 2012) and C<sub>24</sub>-SMTs might play a different role in these organisms. Animal sterol auxotrophs usually lack the three enzymes responsible for the transformation of squalene into lanosterol: farnesyl-diphosphate farnesyltransferase 1 (FDFT1), squalene monooxygenase (SQE) and lanosterol synthase (LAS) (Shamsuzzama et al., 2020). However, the presence of downstream cholesterol synthesis genes has been reported in sterol auxotrophs. Some of these sterol enzymes retain their catalytic functions and are involved in the conversion of dietary sterols into cholesterol (Meyer et al., 1979; Shamsuzzama et al., 2020), while others now have distinct functions (Oh et al., 2017; Shamsuzzama et al., 2020). The function performed by C<sub>24</sub>-SMT enzymes in rotifers would benefit from further study.

# Supplementary Figures and Tables

## List of Supplementary Figures

|                                                                                                                                                                                                                                              |    |
|----------------------------------------------------------------------------------------------------------------------------------------------------------------------------------------------------------------------------------------------|----|
| Supplementary Figure 1   Sitosterol and cholesterol are evenly distributed throughout <i>Olavius algarvensis</i> tissues.....                                                                                                                | 7  |
| Supplementary Figure 2   There is no evidence for a tissue-specific distribution of cholesterol and sitosterol in <i>Olavius algarvensis</i> .. .....                                                                                        | 8  |
| Supplementary Figure 3   Sediment porewater below a <i>P. oceanica</i> meadow (Elba, Italy) contained sitosterol and cholesterol.. .....                                                                                                     | 9  |
| Supplementary Figure 4   <i>Olavius algarvensis</i> encodes and expresses all the enzymes needed to synthesize sitosterol from an intermediate of the cholesterol synthesis pathway.....                                                     | 10 |
| Supplementary Figure 5   <i>Olavius algarvensis</i> squalene monooxygenase (ERG1) sequence clusters with animal sequences.....                                                                                                               | 11 |
| Supplementary Figure 6   <i>Olavius algarvensis</i> lanosterol synthase (ERG7) sequence clusters with animal sequences. ....                                                                                                                 | 12 |
| Supplementary Figure 7   <i>Olavius algarvensis</i> sterol delta-14-demethylase (ERG11) sequences cluster with animal sequences.....                                                                                                         | 13 |
| Supplementary Figure 8   <i>Olavius algarvensis</i> delta(14)-sterol reductase (ERG24) sequence clusters with animal sequences while the sterol 7-dehydrocholesterol reductase (DHCR7) cluster with plants and unicellular sequences.. ..... | 14 |
| Supplementary Figure 9   <i>Olavius algarvensis</i> methylsterol monooxygenase (ERG25) sequence clusters with animal sequences.....                                                                                                          | 15 |
| Supplementary Figure 10   <i>Olavius algarvensis</i> sterol-4-alpha-carboxylate 3-dehydrogenase, decarboxylating (ERG26) sequence clusters with animal sequences. ....                                                                       | 15 |
| Supplementary Figure 11   <i>Olavius algarvensis</i> 3-keto reductase (ERG27) sequence clusters with animal sequences. ....                                                                                                                  | 16 |
| Supplementary Figure 12   <i>Olavius algarvensis</i> sterol C-5 desaturase (ERG3) sequence clusters with animal sequences.. .....                                                                                                            | 16 |
| Supplementary Figure 13   <i>Olavius algarvensis</i> EBP sequence clusters with animal and fungal sequences. ....                                                                                                                            | 16 |
| Supplementary Figure 14   <i>Olavius algarvensis</i> sterol 24-dehydrocholesterol reductase (DHCR24) sequence clusters with animal sequences. ....                                                                                           | 17 |
| Supplementary Figure 15   Alignment of C <sub>24</sub> sterol methyltransferase (SMT) amino acid sequences.....                                                                                                                              | 18 |
| Supplementary Figure 16   The C <sub>24</sub> -SMT of <i>Olavius spp.</i> used zymosterol as a substrate for the first methylation.....                                                                                                      | 19 |
| Supplementary Figure 17   The C <sub>24</sub> -SMT of <i>Olavius spp.</i> used desmosterol as a substrate for the first methylation. ....                                                                                                    | 20 |

|                                                                                                                                                                                                                                     |    |
|-------------------------------------------------------------------------------------------------------------------------------------------------------------------------------------------------------------------------------------|----|
| Supplementary Figure 18   C <sub>24</sub> -SMT of <i>Olavius algarvensis</i> uses two intermediates of the cholesterol synthesis, zymosterol and desmosterol, as substrates for methylation.                                        | 21 |
| Supplementary Figure 19   The C <sub>24</sub> -SMT of <i>Olavius algarvensis</i> added a methyl group to the side chain of zymosterol.                                                                                              | 22 |
| Supplementary Figure 20   Potential substrates for the second C <sub>1</sub> -transfer based on the results of the first C <sub>1</sub> -transfer.                                                                                  | 23 |
| Supplementary Figure 21   The C <sub>24</sub> -SMT of <i>Olavius spp.</i> use 24-methylene-cholesterol as a substrate for the second methylation reaction.                                                                          | 24 |
| Supplementary Figure 22   Most sterol methyltransferase (SMT) homologues identified by BLAST within animal taxa were plant, protist or fungal contaminations, or belonged to the C <sub>4</sub> -SMT, an SMT specific to nematodes. | 26 |

## List of Supplementary Tables

|                                                                                                                                                                                                                                                                                                                                                                                                                                                                                     |    |
|-------------------------------------------------------------------------------------------------------------------------------------------------------------------------------------------------------------------------------------------------------------------------------------------------------------------------------------------------------------------------------------------------------------------------------------------------------------------------------------|----|
| Supplementary Table 1   List of sterols detected by MALDI-2-MSI in <i>Olavius algarvensis</i> .                                                                                                                                                                                                                                                                                                                                                                                     | 26 |
| Supplementary Table 2   List of the enzymes involved in sterol biosynthetic pathway in eukaryotic model organisms.                                                                                                                                                                                                                                                                                                                                                                  | 26 |
| Supplementary Table 3   Detection of enzymes involved in sterol biosynthesis in the draft genome of <i>Olavius algarvensis</i> .                                                                                                                                                                                                                                                                                                                                                    | 27 |
| Supplementary Table 4   Detection of enzymes involved in sterol biosynthesis in the transcriptome of <i>Olavius algarvensis</i> .                                                                                                                                                                                                                                                                                                                                                   | 28 |
| Supplementary Table 5   Detection of enzymes involved in sterol biosynthesis in the proteome of <i>Olavius algarvensis</i> .                                                                                                                                                                                                                                                                                                                                                        | 29 |
| Supplementary Table 6   The sterol profiles of all investigated <i>Olavius</i> and <i>Inanidrilus</i> species was dominated by sitosterol.                                                                                                                                                                                                                                                                                                                                          | 30 |
| Supplementary Table 7   C <sub>24</sub> -SMT homologues were identified in the transcriptomes of all <i>Olavius</i> and <i>Inandrilus</i> species analyzed in this study                                                                                                                                                                                                                                                                                                            | 30 |
| Supplementary Table 8   C <sub>24</sub> -SMT homologues are widely spread in annelids. They were found in the transcriptomes of 9 <i>Olavius</i> and <i>Inanidrilus</i> species, in three deep-sea gutless tubeworm species and 17 gut-bearing annelid species from marine, limnic and terrestrial environments belonging to six different clades. Methylated sterols (C <sub>28</sub> and C <sub>29</sub> ) often account for an important part of the sterol profile of annelids. | 30 |
| Supplementary Table 9   C <sub>24</sub> -SMT homologues are also present in sponges, rotifers and likely in mollusks.                                                                                                                                                                                                                                                                                                                                                               | 30 |
| Supplementary Table 10   Solvent gradient for high-resolution LC-MS/MS with a C30 column.                                                                                                                                                                                                                                                                                                                                                                                           | 31 |
| Supplementary Table 11   MS settings of the Q Exactive Plus Orbitrap (Thermo Fisher Scientific) equipped with a HESI probe and a Vanquish Horizon UHPLC System (Thermo Fisher Scientific).                                                                                                                                                                                                                                                                                          | 31 |
| Supplementary Table 12   List of the enzymes isolated from model organisms used as query to assess the ability of gutless annelids to synthesize sterols.                                                                                                                                                                                                                                                                                                                           | 32 |

|                                                                                                                                                  |    |
|--------------------------------------------------------------------------------------------------------------------------------------------------|----|
| Supplementary Table 13   Details of the sequences, plasmid, and <i>E. coli</i> cells used for the heterologous gene expression experiments. .... | 33 |
| Supplementary Table 14   List of the different sterol substrates tested with the animal C <sub>24</sub> -SMTs. ....                              | 34 |
| Supplementary Table 15   Solvent gradient for high-resolution LC-MS/MS with C18 column.....                                                      | 34 |

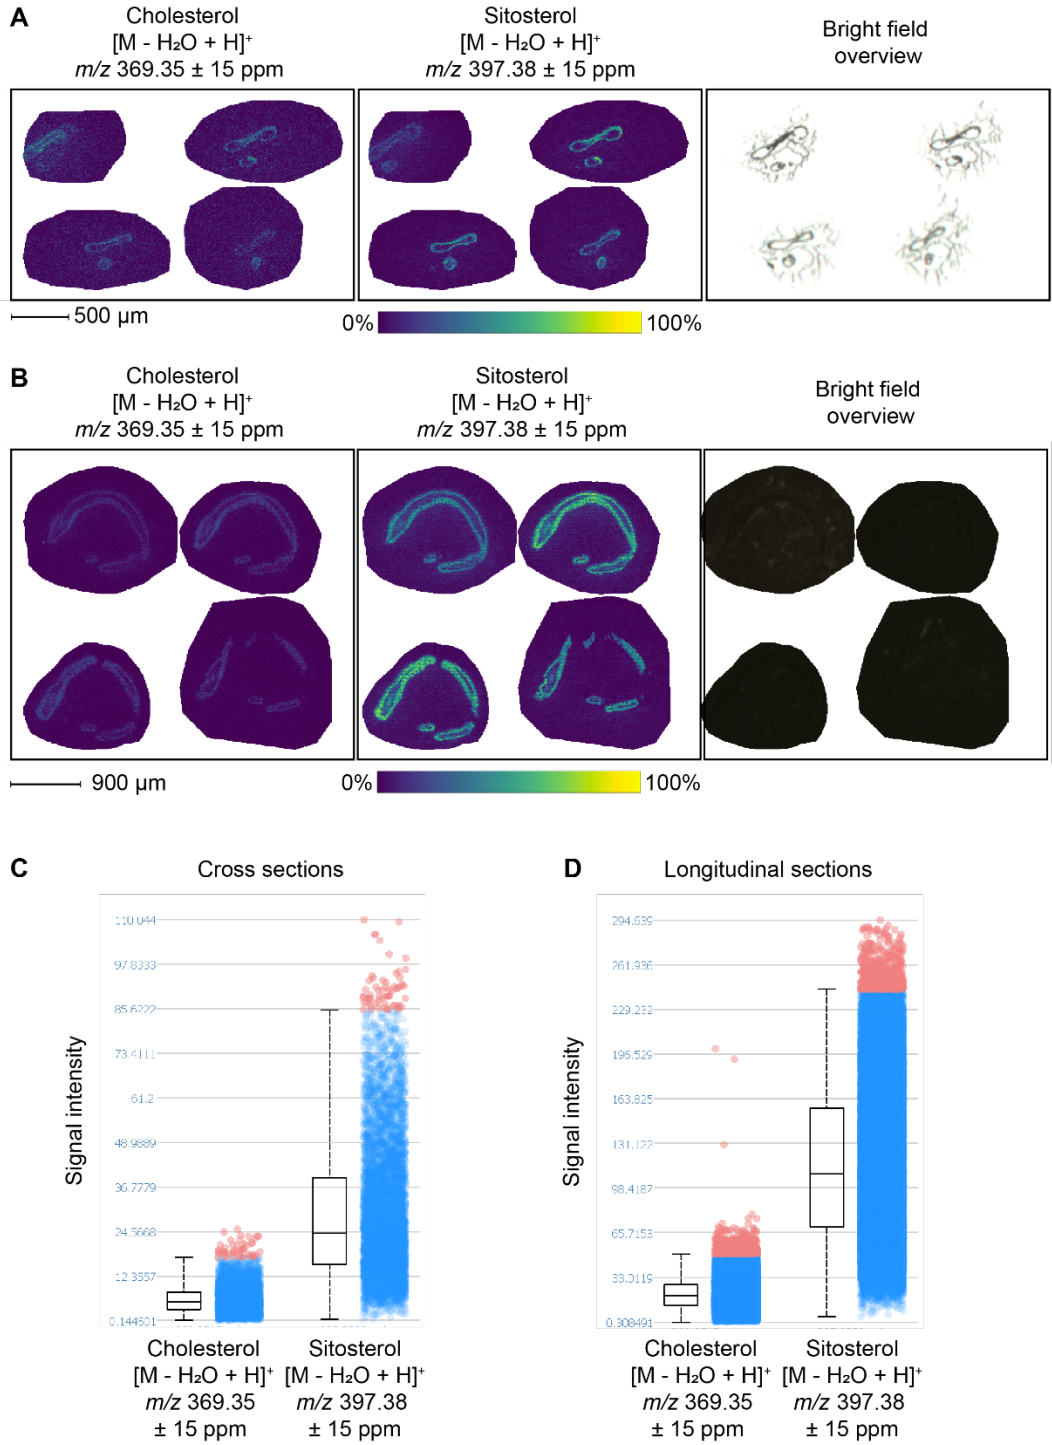

**Supplementary Figure 1 | Sitosterol and cholesterol are evenly distributed throughout *Olavius algarvensis* tissues.** Panels show cholesterol ([M-H<sub>2</sub>O+H]<sup>+</sup> at m/z 369.352) and sitosterol ([M-H<sub>2</sub>O+H]<sup>+</sup> at m/z 397.382) distribution in *O. algarvensis* cross sections (**A**) and longitudinal sections (**B**) measured by MALDI-2-MSI. Sitosterol is more abundant than cholesterol in the worm tissues (**C** and **D**).

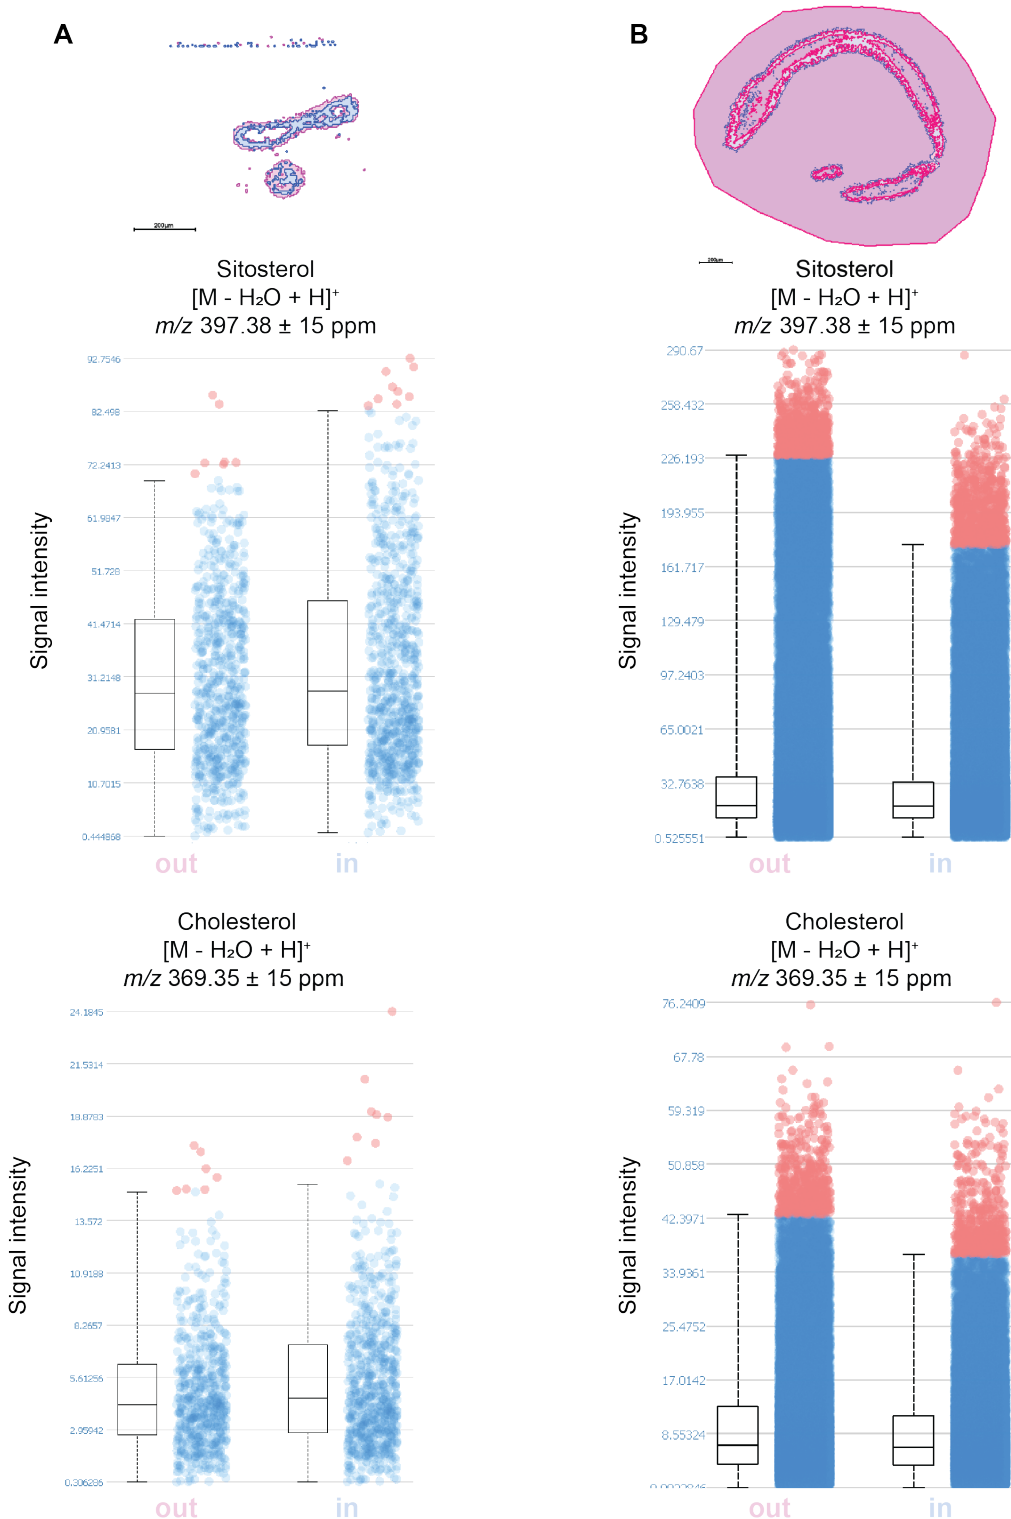

**Supplementary Figure 2 | No tissue-specific distribution of cholesterol and sitosterol in *Olavius algarvensis*.** Both sterols were uniformly distributed throughout the animals' tissues. Distribution of cholesterol and sitosterol as measured with MALDI-2-MSI. The data was segmented and the signal intensity of both sterols measured to investigate tissue specific sterol distribution in cross sections (**A**) and longitudinal sections (**B**). The colonized tissues (out) do not contain more sterols than the host-only tissues (in). The presence of the symbionts does not influence the sterol distribution in the host tissues.



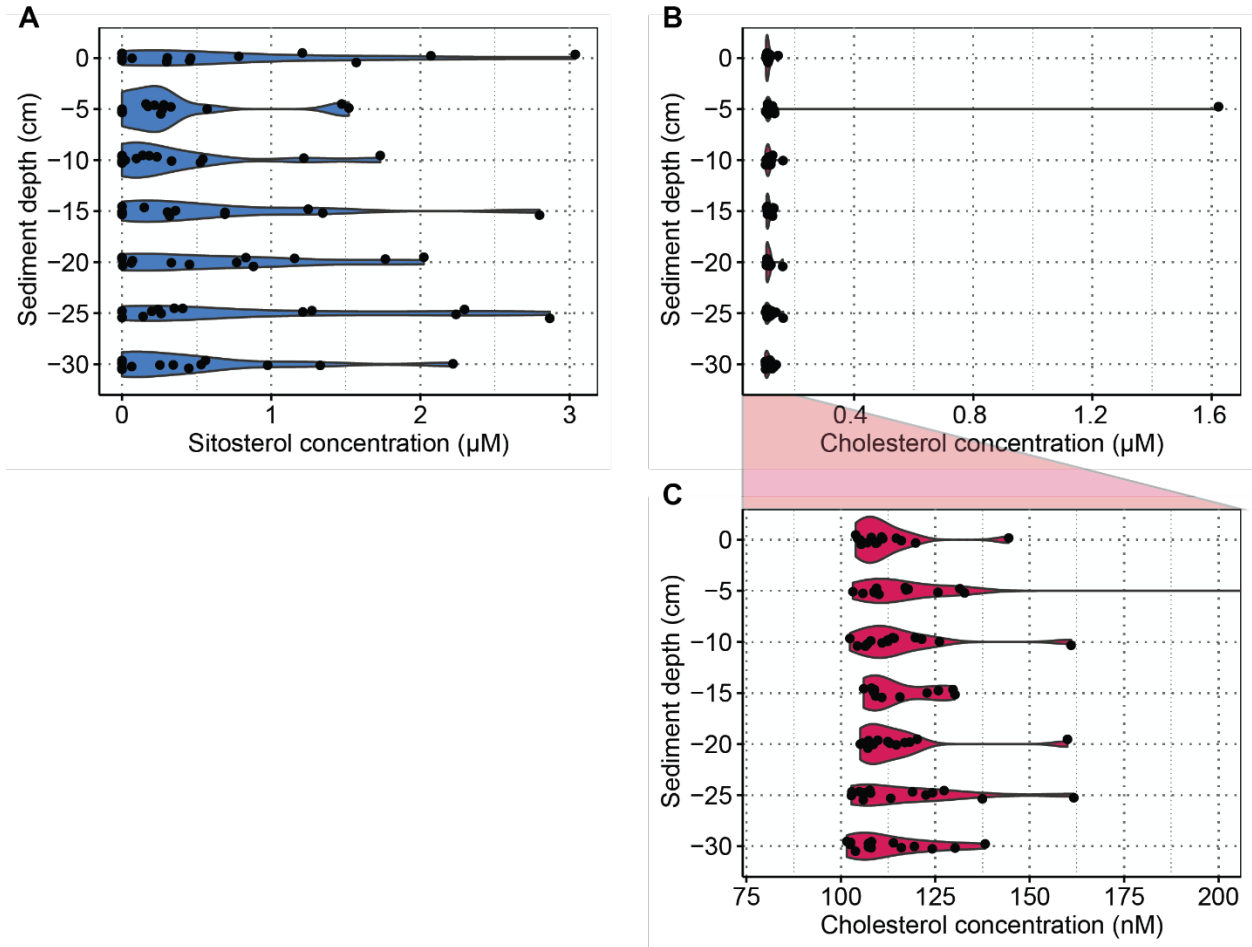

**Supplementary Figure 3 | Sediment porewater below a *P. oceanica* meadow (Elba, Italy) contained sitosterol and cholesterol. A,** Sitosterol (blue) was present at micromolar concentration under the seagrass bed. **B,** Cholesterol (red) was present in nanomolar concentrations under the seagrass bed, with one exception in the low micromolar range. **C,** Magnified view of **B** to show the variation in cholesterol concentrations between 100 to 200 nanomolar.

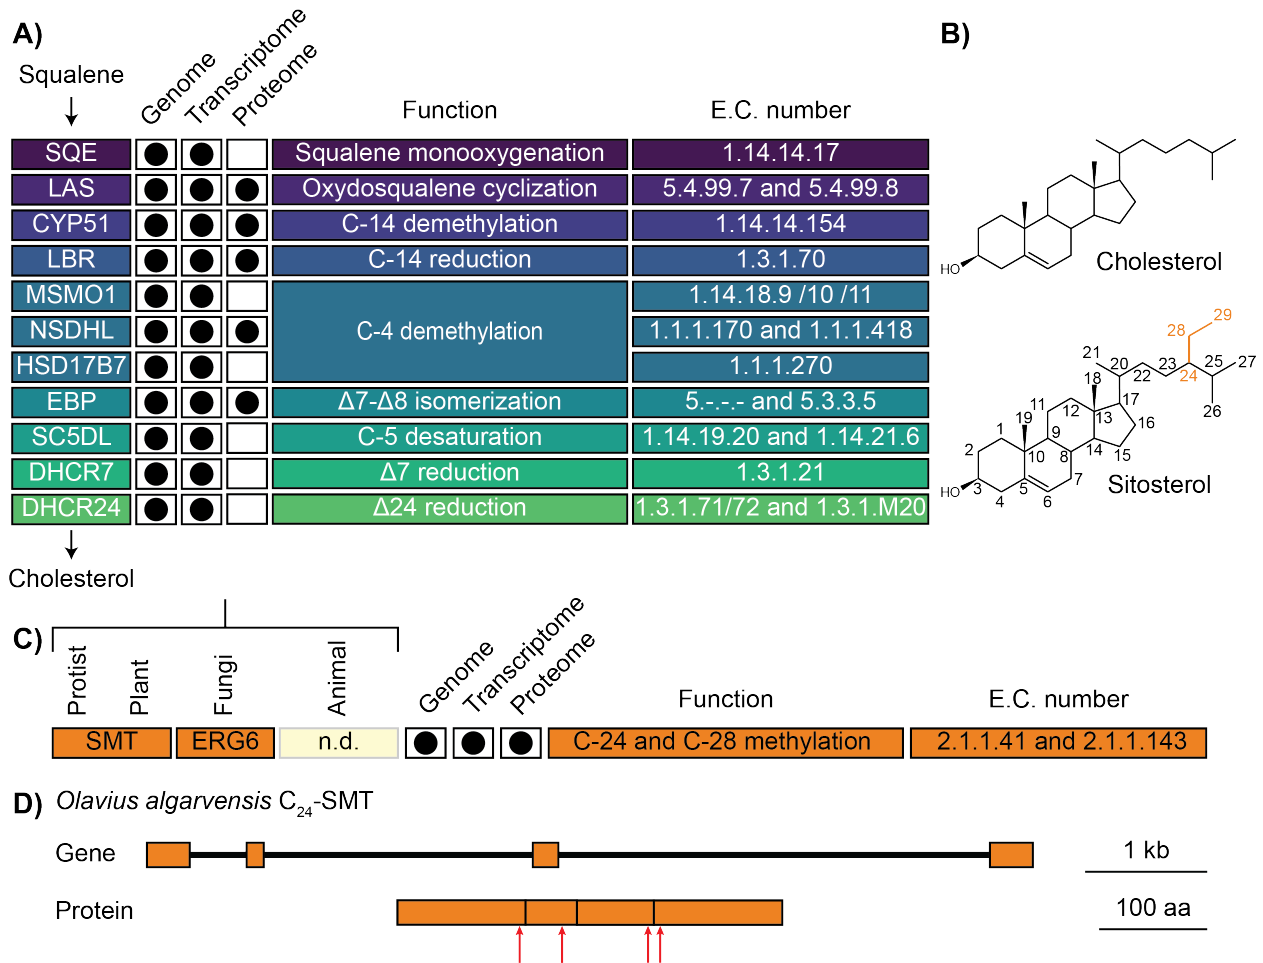

**Supplementary Figure 4 | *Olavius algarvensis* encodes and expresses all the enzymes needed to synthesize sitosterol from an intermediate of the cholesterol synthesis pathway.** **A**, All 11 enzymes involved in cholesterol synthesis were encoded and expressed by *O. algarvensis*. **B**, An ethyl group attached to the sterol side chain differentiates the phytosterol sitosterol from the animal sterol cholesterol. **C**, *O. algarvensis* encodes and expresses a homolog of C<sub>24</sub>-SMT, an enzyme not previously found in bilateral animals and essential to sitosterol synthesis. Dots indicate detection in the genome, transcriptome and proteome of *O. algarvensis*. **D**, The *O. algarvensis* C<sub>24</sub>-SMT gene consists of 4 exons forming a 1071 bp open reading frame encoding a 356 amino-acid polypeptide. The four conserved regions of the enzyme are highlighted by red arrows.

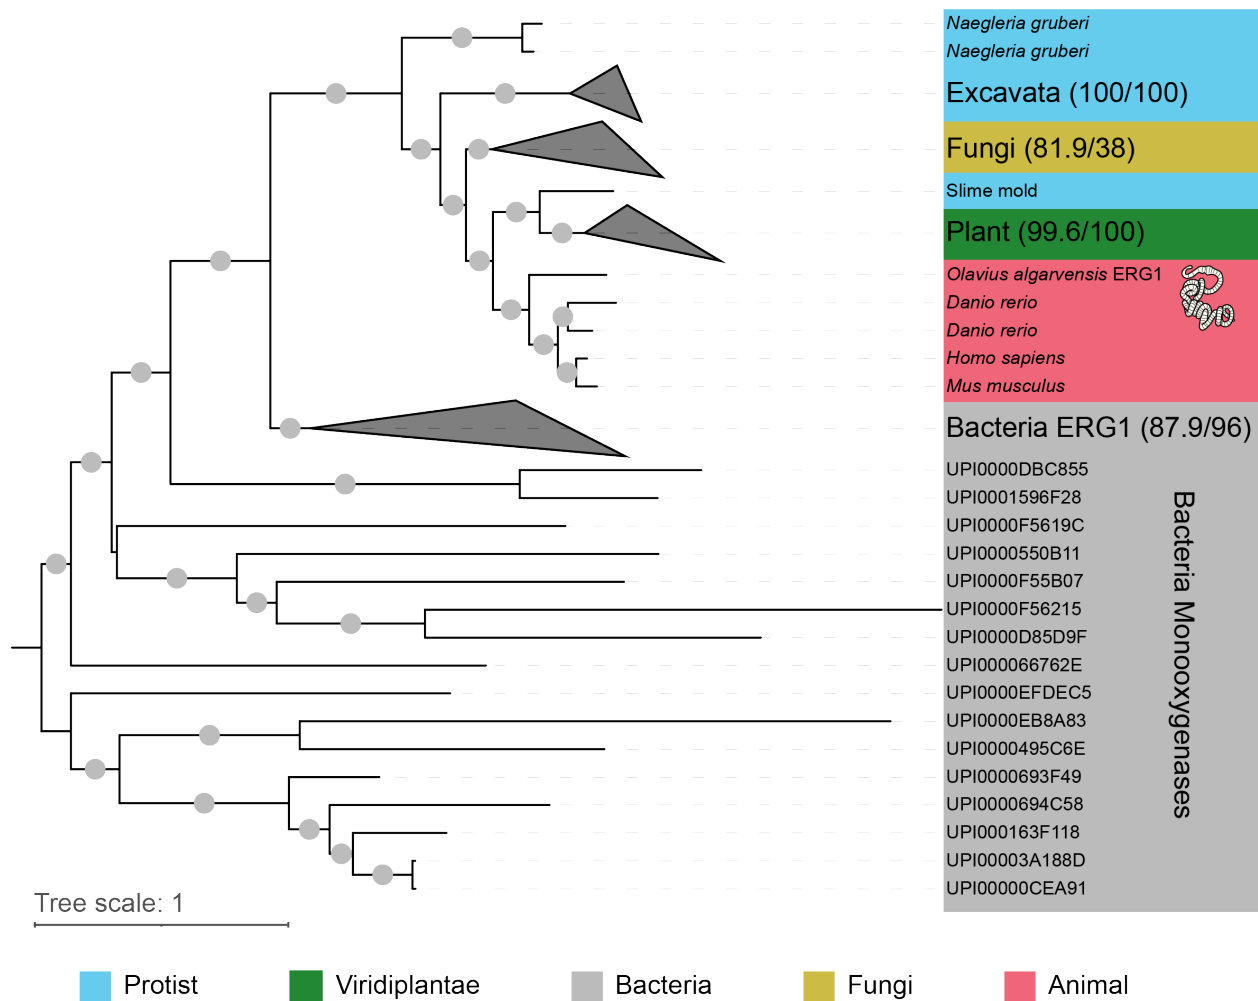

**Supplementary Figure 5 | *Olavius algarvensis* squalene monoxygenase (ERG1) sequence clusters with animal sequences.** Maximum likelihood tree of ERG1 amino acid sequences. Bootstrap values  $\geq 90\%$  are shown with a grey circle. The bootstrap value and branch support value are indicated in brackets for collapsed groups. The tree was rooted at midpoint in iTOL.

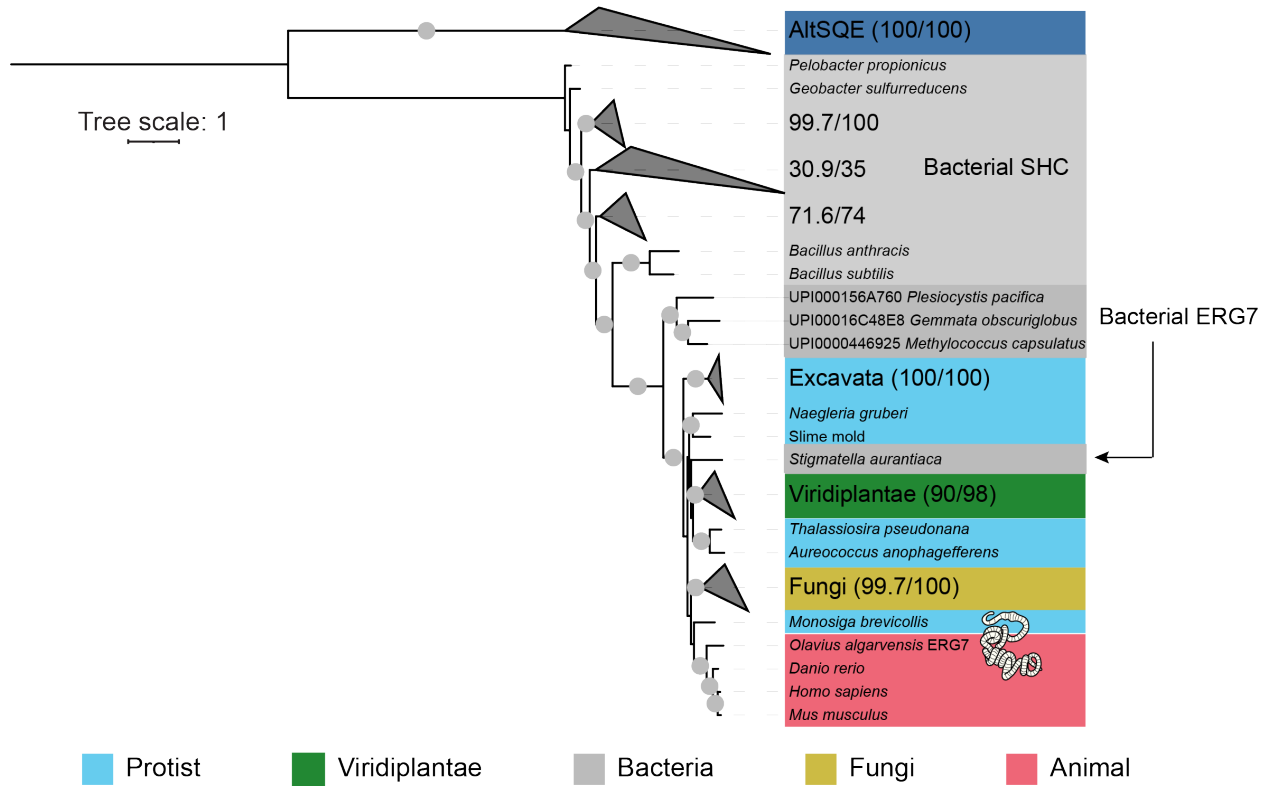

**Supplementary Figure 6 | *Olavius algarvensis* lanosterol synthase (ERG7) sequence clusters with animal sequences.** Maximum likelihood tree of ERG7 amino acid sequences, alternative squalene epoxidase (AltSQE) and the bacterial squalene-hopene cyclase (SHC) were used as outgroups. Bootstrap values  $\geq 90\%$  are shown with a grey circle. The bootstrap value and branch support value are indicated in brackets for collapsed groups. The tree was rooted at midpoint in iTOL.

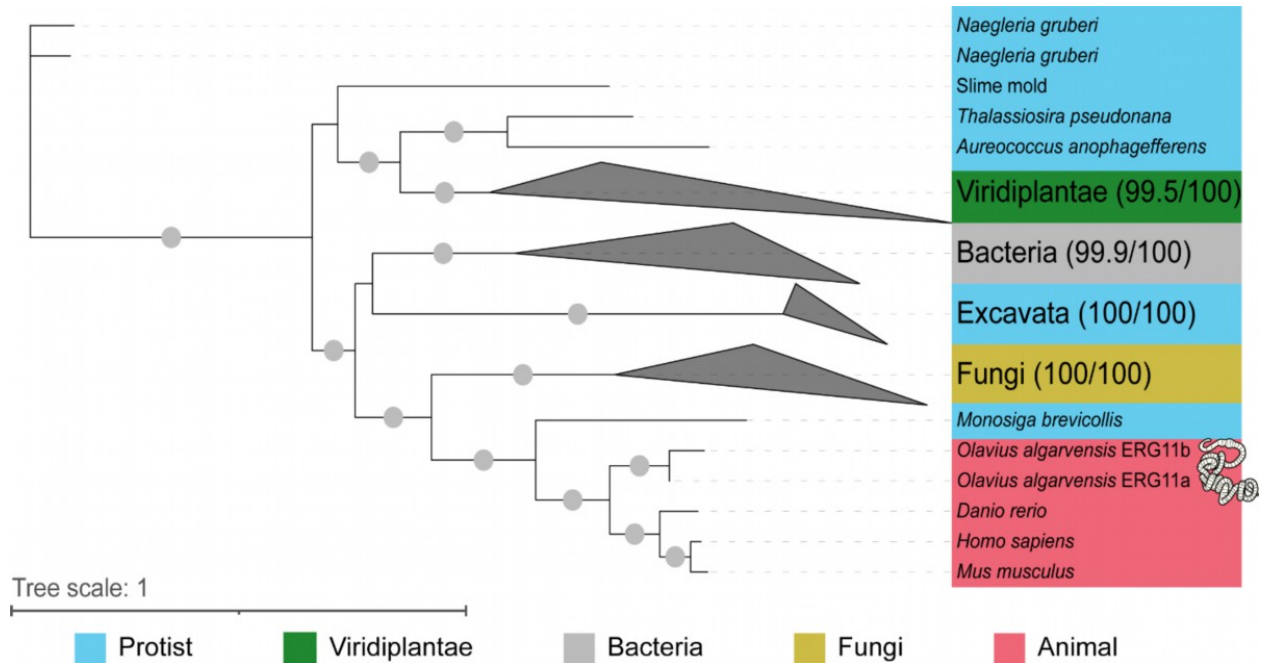

**Supplementary Figure 7 | *Olavius algarvensis* sterol delta-14-demethylase (ERG11) sequences cluster with animal sequences.** Maximum likelihood tree of ERG11 amino acid sequences. Bootstrap values  $\geq 90\%$  are marked with a grey circle. The bootstrap value and branch support value are indicated in brackets for collapsed groups. The tree was rooted at midpoint in iTOL.

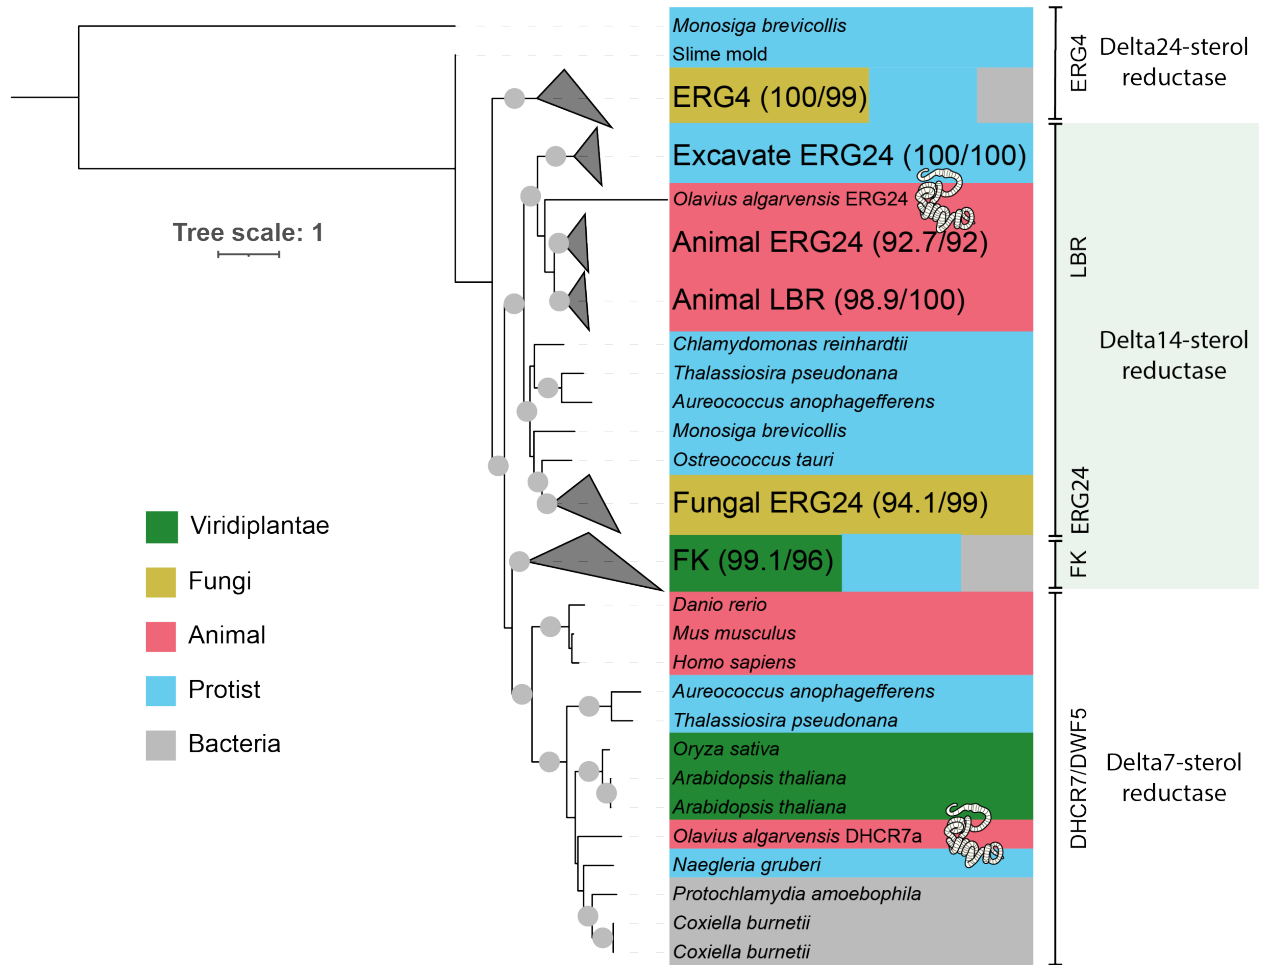

**Supplementary Figure 8 | *Olavius algarvensis* delta14-sterol reductase (ERG24) sequence clusters with animal sequences while the sterol 7-dehydrocholesterol reductase (DHCR7) cluster with plants and unicellular sequences.** The placement of *O. algarvensis* DHCR7 might indicate affinity for a substrate different from that of other animals. Maximum likelihood tree of the (ERG4)-(DHCR7/DWF5)-(ERG24/LBR/FK) protein family, here we have an example of enzyme performing different steps in fungi, animals and plant but that are evolutionary related. Bootstrap values  $\geq 90\%$  are marked with a grey circle. The bootstrap value and branch support value are indicated in brackets for collapsed groups. The tree was rooted at midpoint in iTOL.

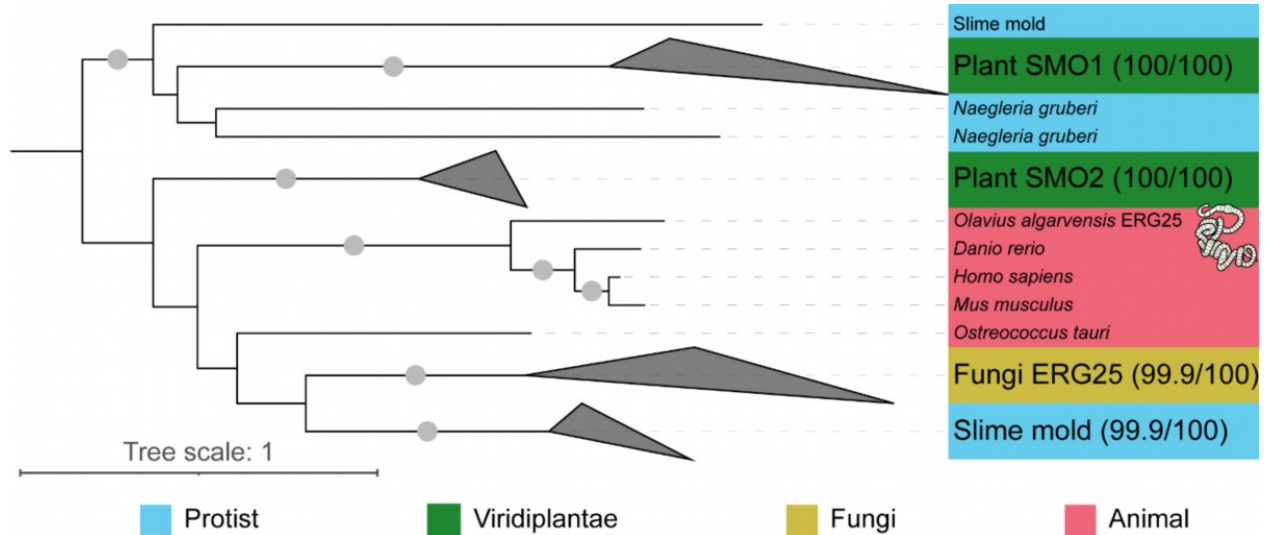

**Supplementary Figure 9 | *Olavius algarvensis* methylsterol monooxygenase sequence clusters with animal sequences.** Maximum likelihood tree of methylsterol monooxygenase (SMO1/SMO2-ERG25-MSMO) amino acid sequences. Bootstrap values  $\geq 90\%$  are marked with a grey circle. The bootstrap value and branch support value are indicated in brackets for collapsed groups. The tree was rooted at midpoint in iTOL.

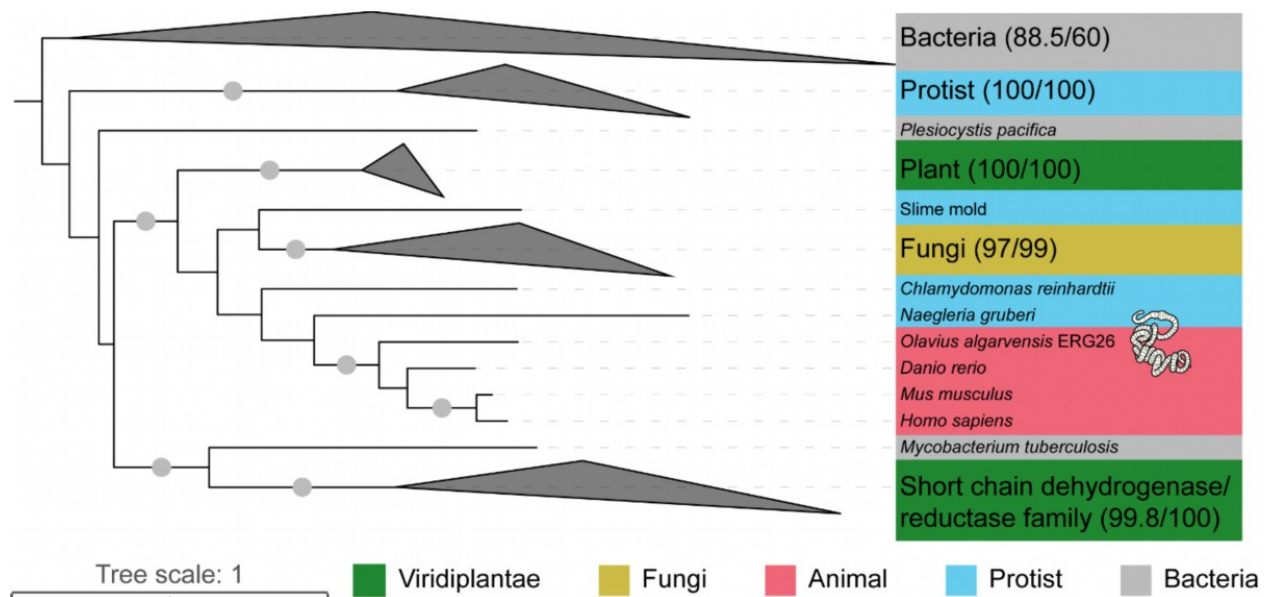

**Supplementary Figure 10 | *Olavius algarvensis* sterol-4-alpha-carboxylate 3-dehydrogenase, decarboxylating sequence clusters with animal sequences.** Maximum likelihood tree of sterol-4-alpha-carboxylate 3-dehydrogenase (HSD-NSDHL-ERG26) amino acid sequences. Bootstrap values  $\geq 90\%$  are marked with a grey circle. The bootstrap value and branch support value are indicated in brackets for collapsed groups. The tree was rooted at midpoint in iTOL.

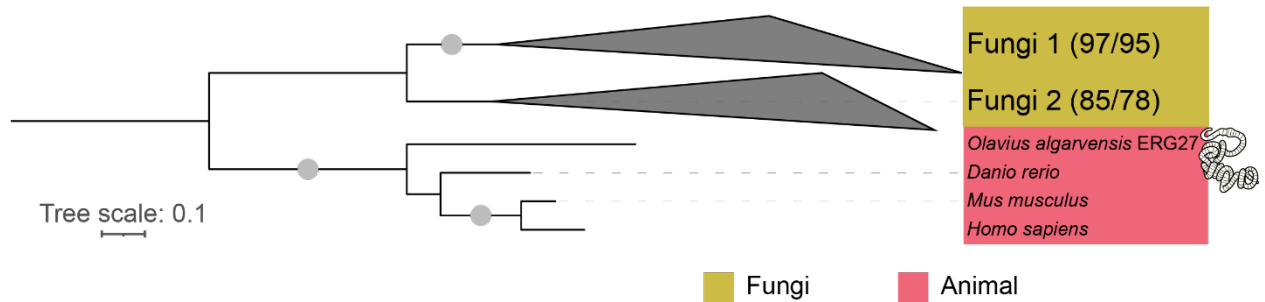

**Supplementary Figure 11 | *Olavius algarvensis* 3-keto reductase (ERG27) sequence clusters with animal sequences.** Maximum likelihood tree of ERG27 amino acid sequences. Bootstrap values  $\geq 90\%$  are marked with a grey circle. The bootstrap value and branch support value are indicated in brackets for collapsed groups. The tree was rooted at midpoint in iTOL. The gene performing C-3 keto reduction in plants and protists is still unknown.

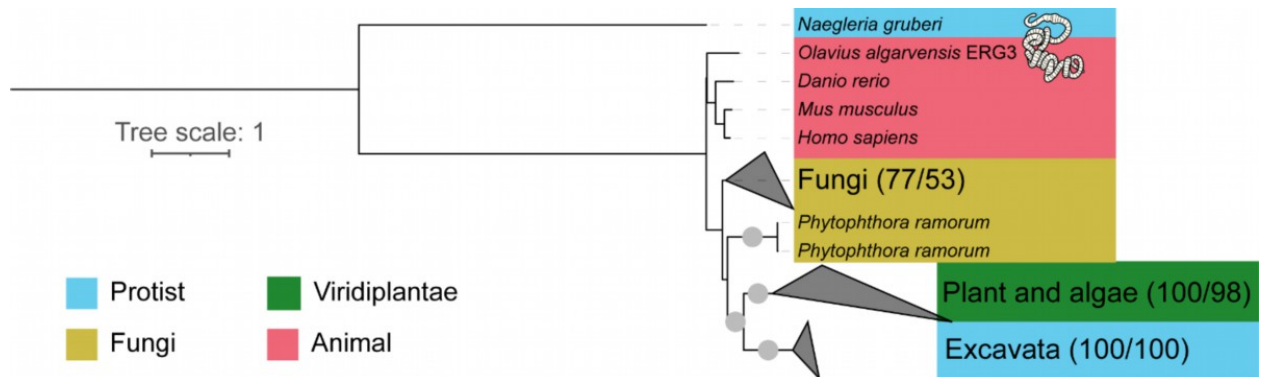

**Supplementary Figure 12 | *Olavius algarvensis* sterol C-5 desaturase (ERG3) sequence clusters with animal sequences.** Maximum likelihood tree of ERG3 amino acid sequences. Bootstrap values  $\geq 90\%$  are marked with a grey circle. The bootstrap value and branch support value are indicated in brackets for collapsed groups. The tree was rooted at midpoint in iTOL.

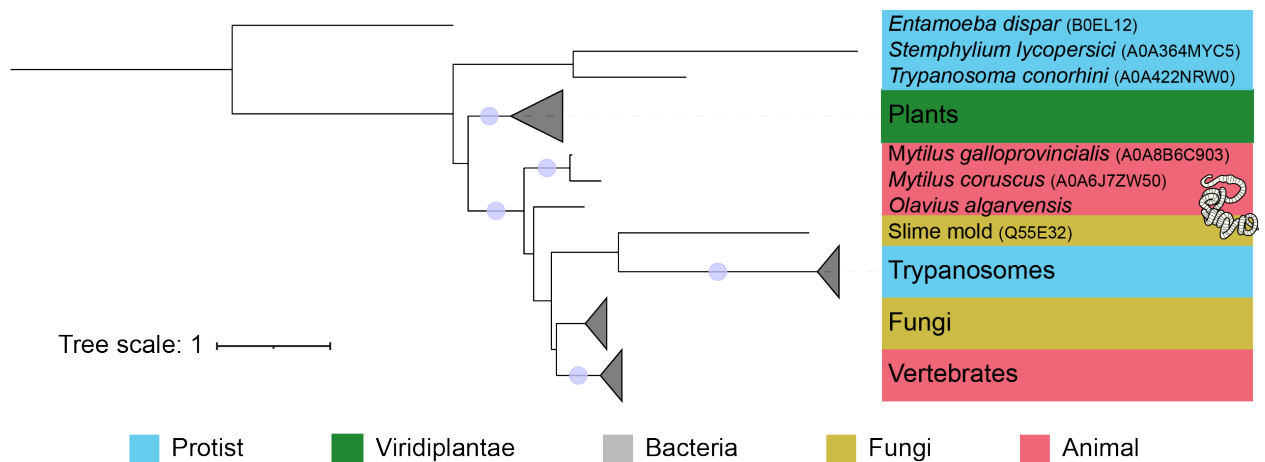

**Supplementary Figure 13 | *Olavius algarvensis* delta7-delta8-sterol isomerase (EBP) sequence clusters with animal and fungal sequences.** Maximum likelihood tree of EBP amino acid sequences. Bootstrap values  $\geq 95\%$  are marked with a grey circle. The tree was rooted at midpoint in iTOL.



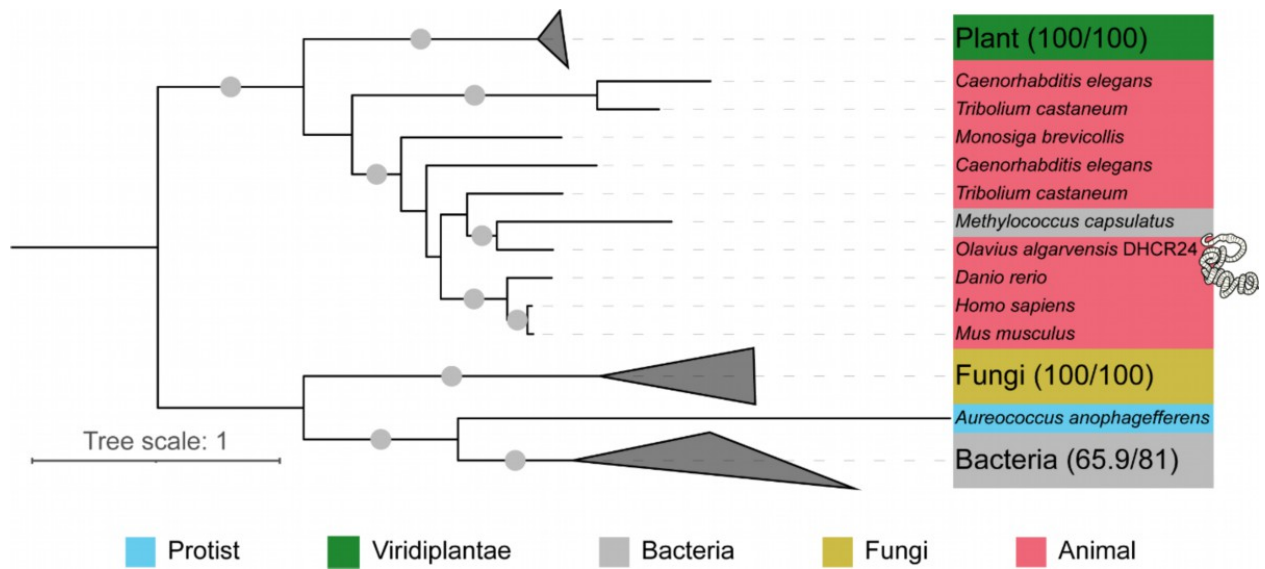

**Supplementary Figure 14 | *Olavius algarvensis* sterol 24-dehydrocholesterol reductase (DHCR24) sequence clusters with animal sequences.** Maximum likelihood tree of DHCR24 amino acid sequences. Bootstrap values  $\geq 90\%$  are marked with a grey circle. The bootstrap value and branch support value are indicated in brackets for collapsed groups. The tree was rooted at midpoint in iTOL.

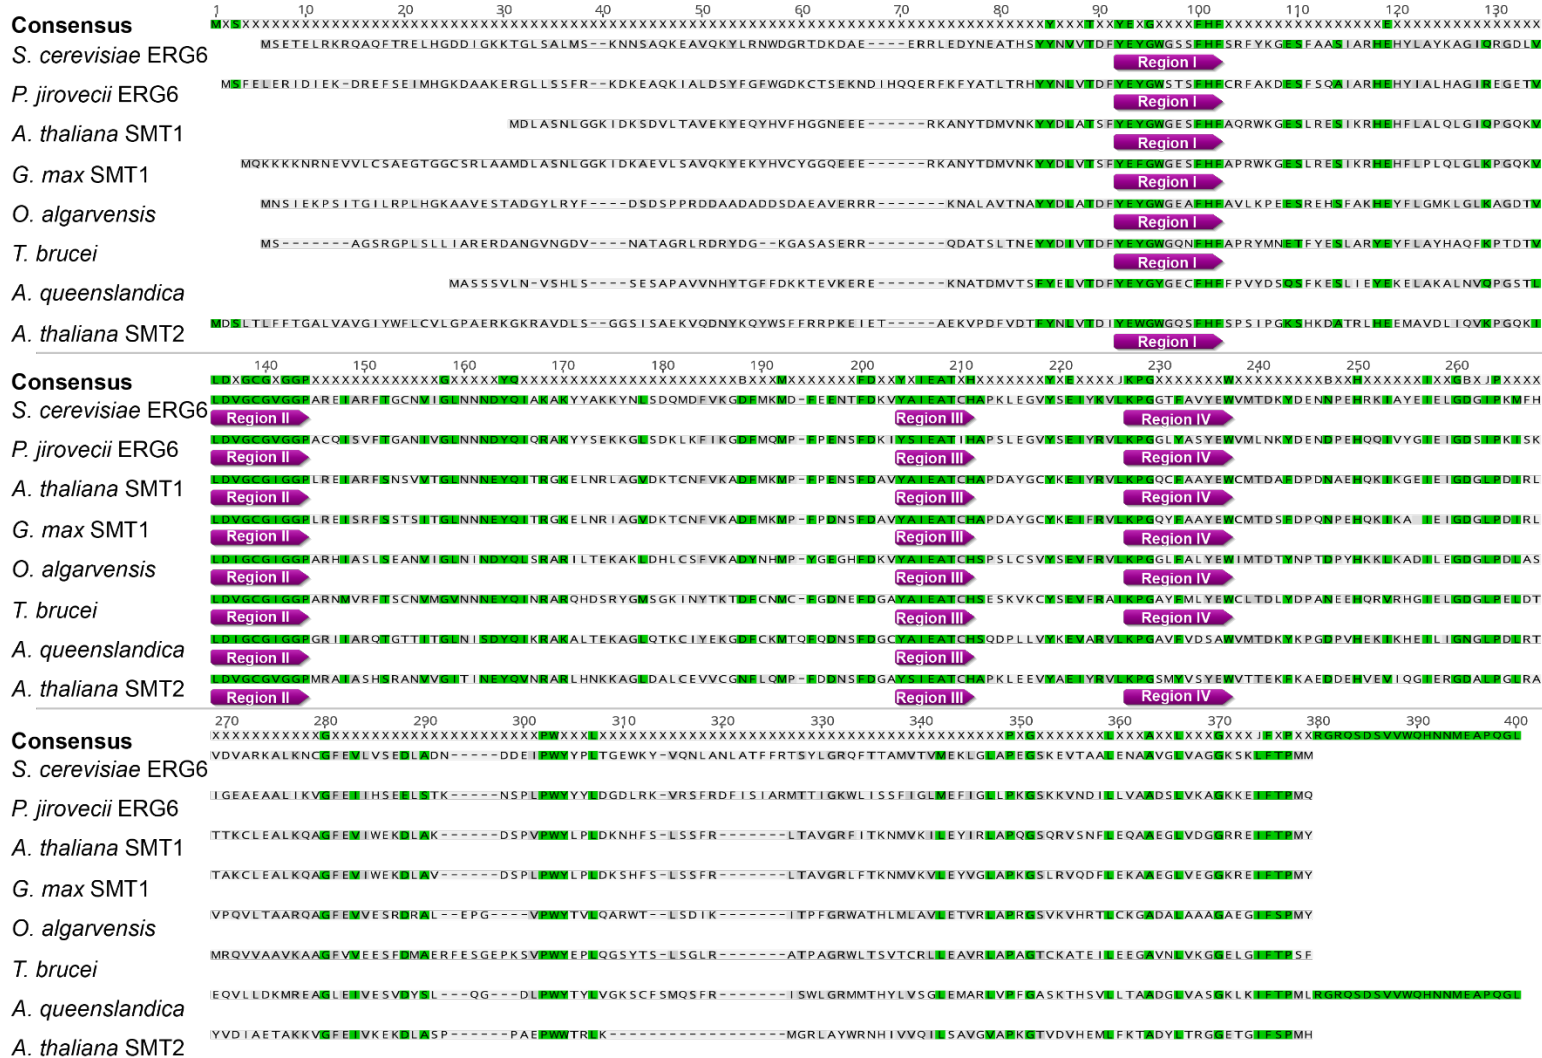

**Supplementary Figure 15 | Alignment of C-24 sterol methyltransferase (C<sub>24</sub>-SMT) amino acid sequences.** Sequences from: fungi, *Saccharomyces cerevisiae* (P25087) and *Pneumocystis* (Q96WX4); plants: *Arabidopsis thaliana* SMT1 (Q9LM02) and SMT2 (Q39227) and *Glycine max* SMT1 (Q43445); gutless annelid: *Olavius algarvensis* (this study); excavate: *Trypanosoma brucei* (Q4FKJ2); and sponge: *Amphimedon queenslandica* (A0A1X7ULF8). The sequences were aligned using ClustalW (Geneious). Purple labels indicate sterol (II) and AdoMet (I, III and IV) binding regions.

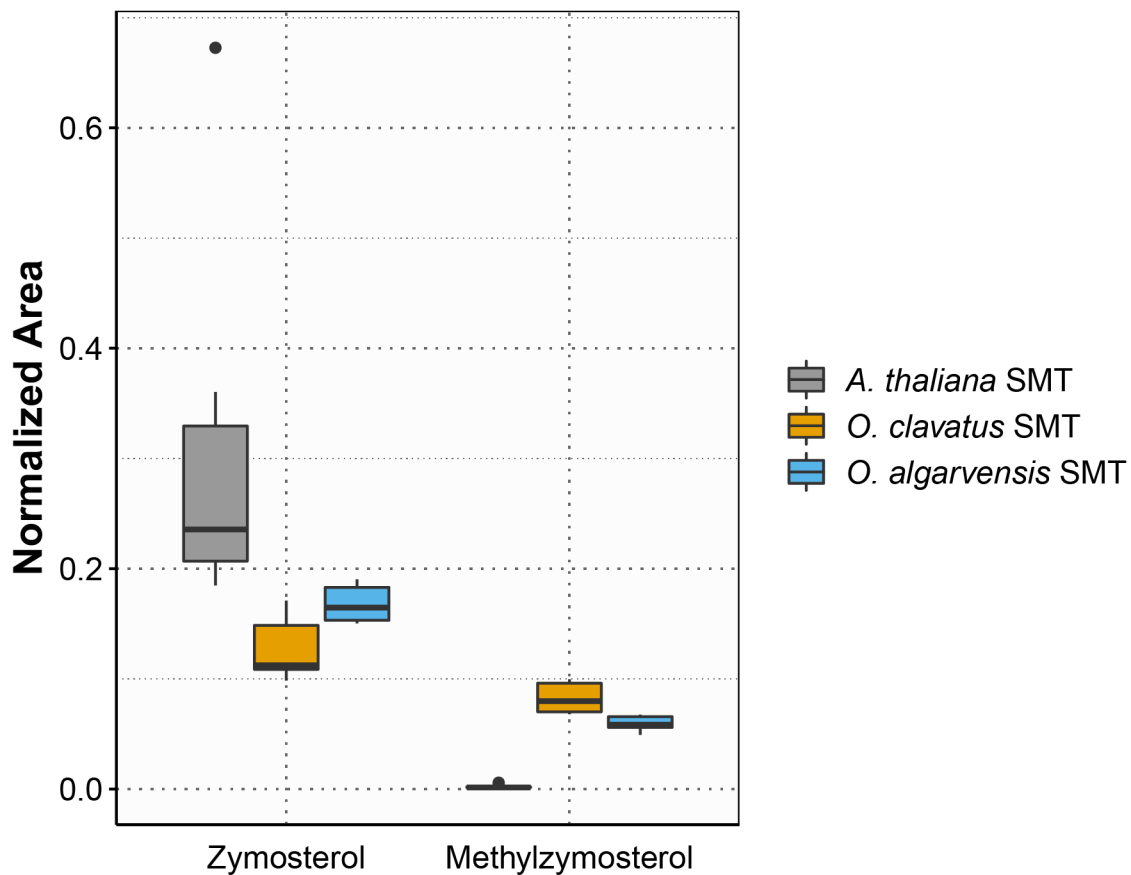

**Supplementary Figure 16 | The C<sub>24</sub>-SMT of *Olavius* spp. used zymosterol as a substrate for the first methylation.** . *Arabidopsis thaliana* C<sub>24</sub>-SMT did not methylate zymosterol. The heterologously expressed C<sub>24</sub>-SMT enzymes from both *O. algarvensis* and *O. clavatus* were able to methylate zymosterol to methylzymosterol. The peak of the substrate (zymosterol) and of the product (methylzymosterol) were integrated at the end of the enzymatic assay, in which *E. coli* expressed C<sub>24</sub>-SMT from each taxon ( $n = 5$  in each case) was incubated with zymosterol as substrate. The abundance was normalized with an internal standard.

**(A) Substrate - Desmosterol**

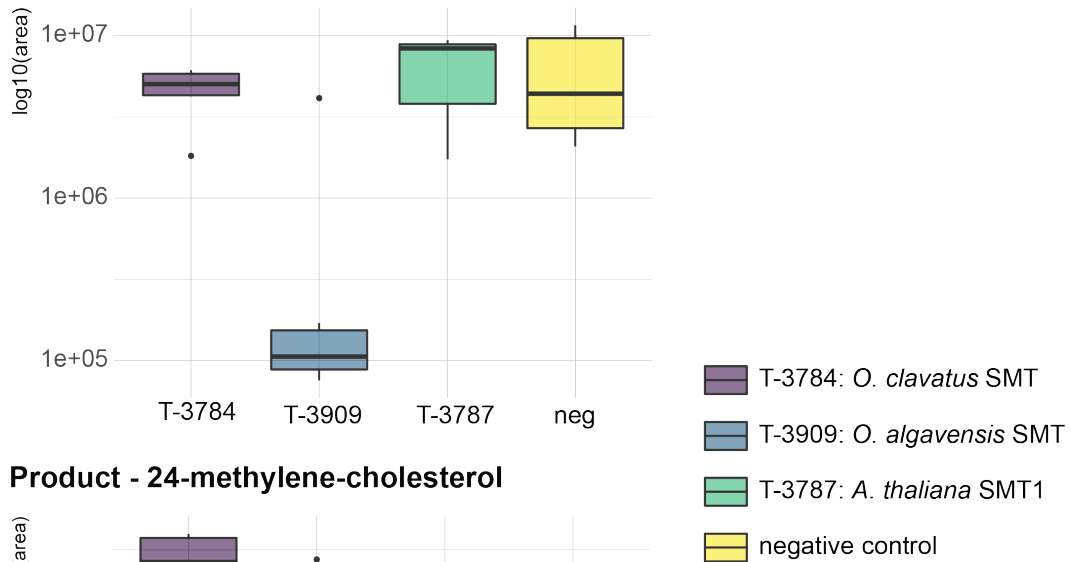

**Product - 24-methylene-cholesterol**

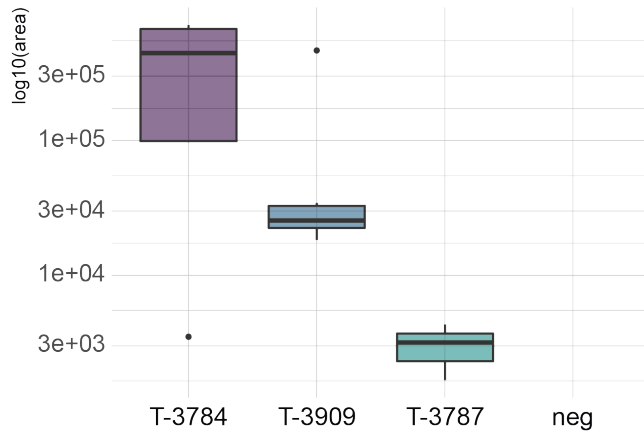

**Supplementary Figure 17 | The C<sub>24</sub>-SMT of *Olavius* spp. used desmosterol as a substrate for the first methylation step.** *Arabidopsis thaliana* C<sub>24</sub>-SMT was not able to methylate desmosterol. The heterologously expressed C<sub>24</sub>-SMT enzymes from both *O. algavensis* and *O. clavatus* were able to methylate desmosterol to produce 24-methylene-cholesterol. The abundance of the substrate (desmosterol) and the product (24-methylene-cholesterol) were measured at the end of the enzymatic assay, in which *E. coli* expressed C<sub>24</sub>-SMT from each taxon ( $n = 5$  in each case) was incubated with desmosterol as substrate.

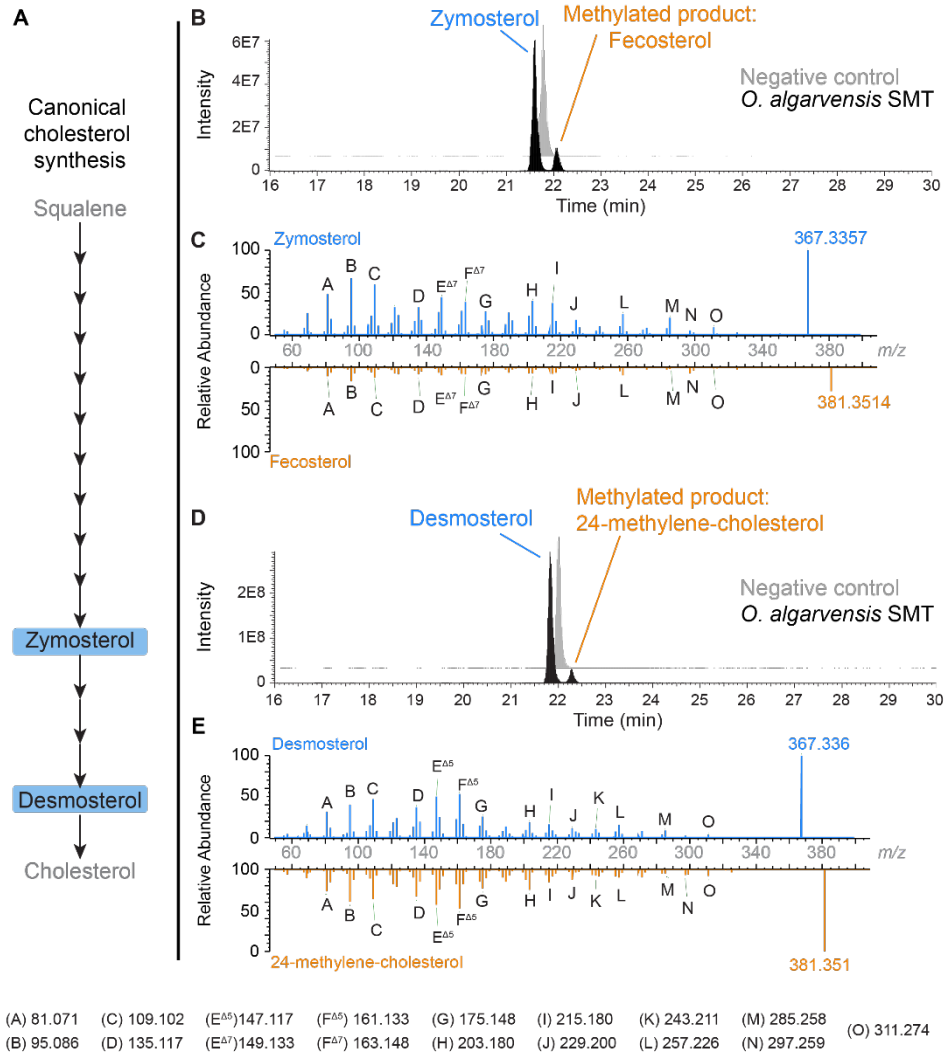

**Supplementary Figure 18 | C<sub>24</sub>-SMT of *Olavius algarvensis* uses two intermediates of the cholesterol synthesis, zymosterol and desmosterol, as substrates for methylation. A**, Zymosterol and desmosterol are intermediates of the classical animal cholesterol synthesis. They are produced in the second half of the cholesterol synthesis pathway. **B and D**, *O. algarvensis* C<sub>24</sub>-SMT, after overexpression in *E. coli*, added a methyl group to the side chain of zymosterol and desmosterol. LC-MS chromatograms of the enzymatic assay performed with zymosterol and desmosterol as substrates. **C and E**, The substrates and methylated products were identified by MS/MS.

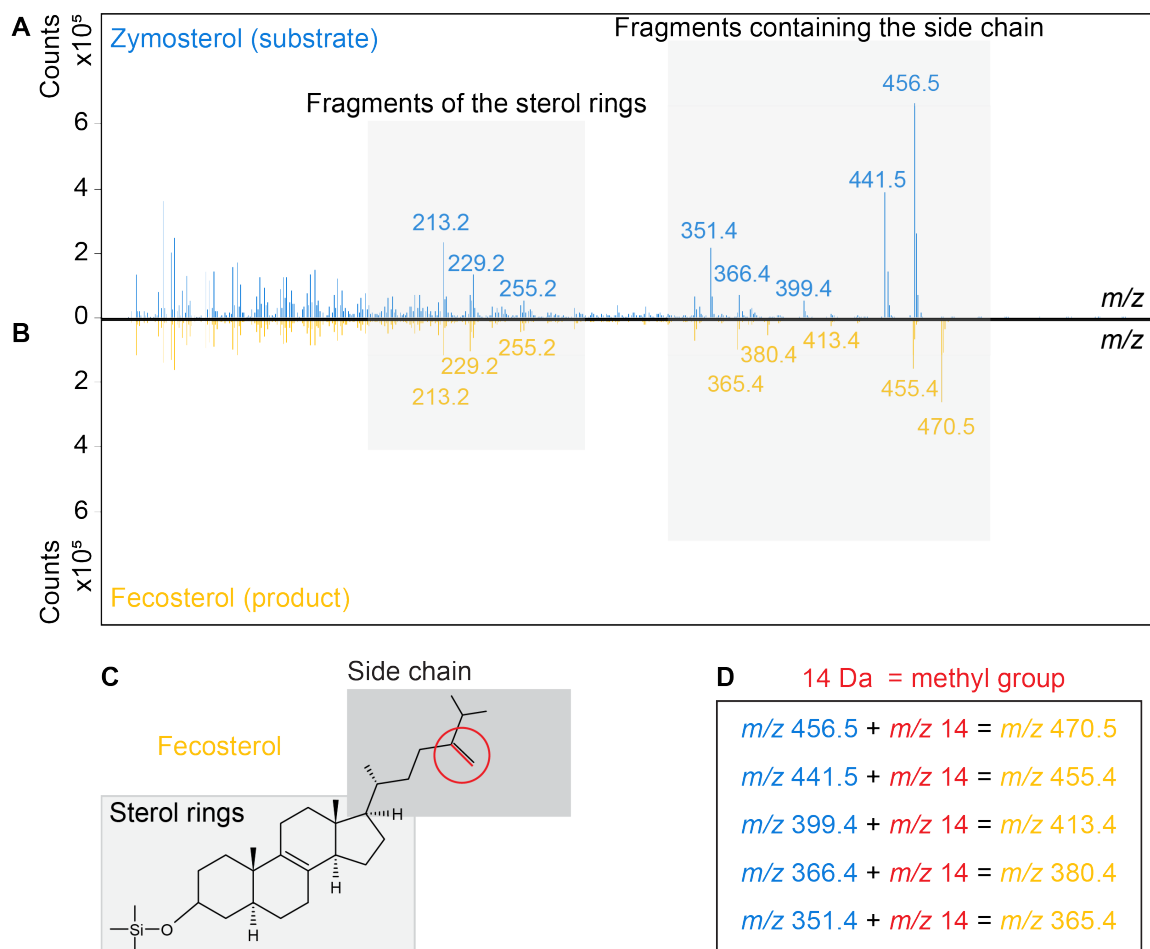

**Supplementary Figure 19 | The C<sub>24</sub>-SMT of *Olavius algarvensis* added a methyl group to the side chain of zymosterol. A, B, Representative mass spectra of zymosterol (A) and the compound identified as fecosterol (24-methylene-zymosterol) (B). C, Structure of fecosterol, with the methyl group highlighted in red. D, In the comparison of the mass spectra of zymosterol and fecosterol, the fragments containing the side chain were shifted by 14 Da, a difference that represents the addition of a methyl group. No mass shift was observed in the sterol ring fragments. These results indicate that a methyl group was added to the zymosterol side chain.**

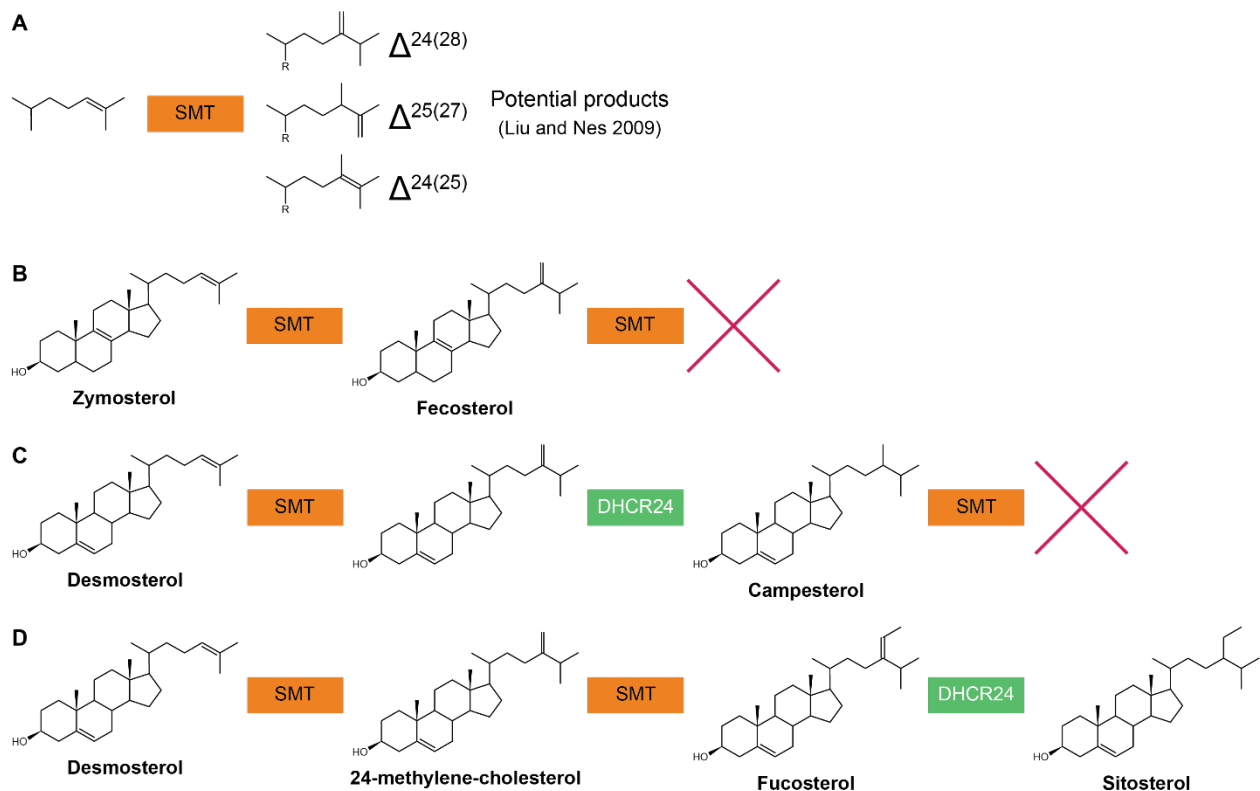

**Supplementary Figure 20 | Potential substrates for the second C<sub>1</sub>-transfer based on the results of the first C<sub>1</sub>-transfer. A**, C<sub>24</sub>-SMT can produce different products. *O. algarvensis* C<sub>24</sub>-SMT mainly produced methylene ( $\Delta^{24(28)}$ ) products. **B**, *O. algarvensis* C<sub>24</sub>-SMT methylates zymosterol to produce fecosterol. Fecosterol was not methylated further by *O. algarvensis* C<sub>24</sub>-SMT. **C and D**, *O. algarvensis* C<sub>24</sub>-SMT added a methyl group to desmosterol to produce 24-methylene-cholesterol. **C**, The methylene group is then likely reduced by sterol C<sub>24</sub>-reductase (DHCR24), producing campesterol. Campesterol was identified as a potential candidate for the second methylation step but *O. algarvensis* C<sub>24</sub>-SMT could not use it as a substrate. **D**, The product of desmosterol methylation could also be used directly as a substrate for the second methylation. *O. algarvensis* C<sub>24</sub>-SMT added a methyl group to 24-methylene-cholesterol, producing fucosterol. DHCR24, which is expressed based on its presence in *O. algarvensis* transcriptomes, could then remove the  $\Delta^{24(28)}$  double bond and transform fucosterol into sitosterol.

### (A) Substrate - 24-methylene-cholesterol

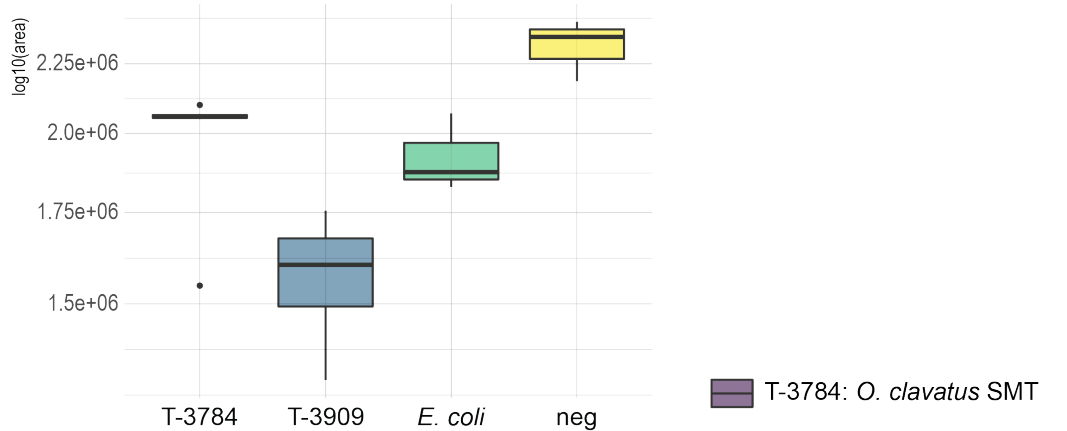

### (B) Product - Fucosterol

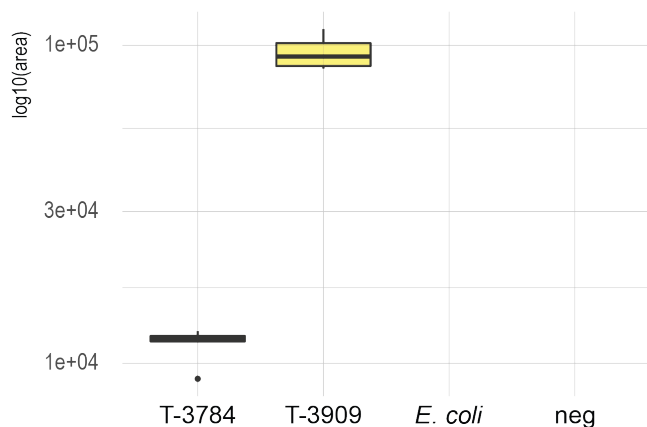

**Supplementary Figure 21 | The  $C_{24}$ -SMT of *Olavius* spp. use 24-methylene-cholesterol as a substrate for the second methylation reaction.** The enzymes from both *O. algarvensis* and *O. clavatus* used 24-methylene-cholesterol as substrate and produced fucosterol. The abundance of the substrate (24-methylene-cholesterol) and the product (fucosterol) were integrated at the endpoint of the enzymatic assay, in which *E. coli* expressed  $C_{24}$ -SMT from each taxon ( $n = 5$  in each case) was incubated with 24-methylene-cholesterol as substrate.



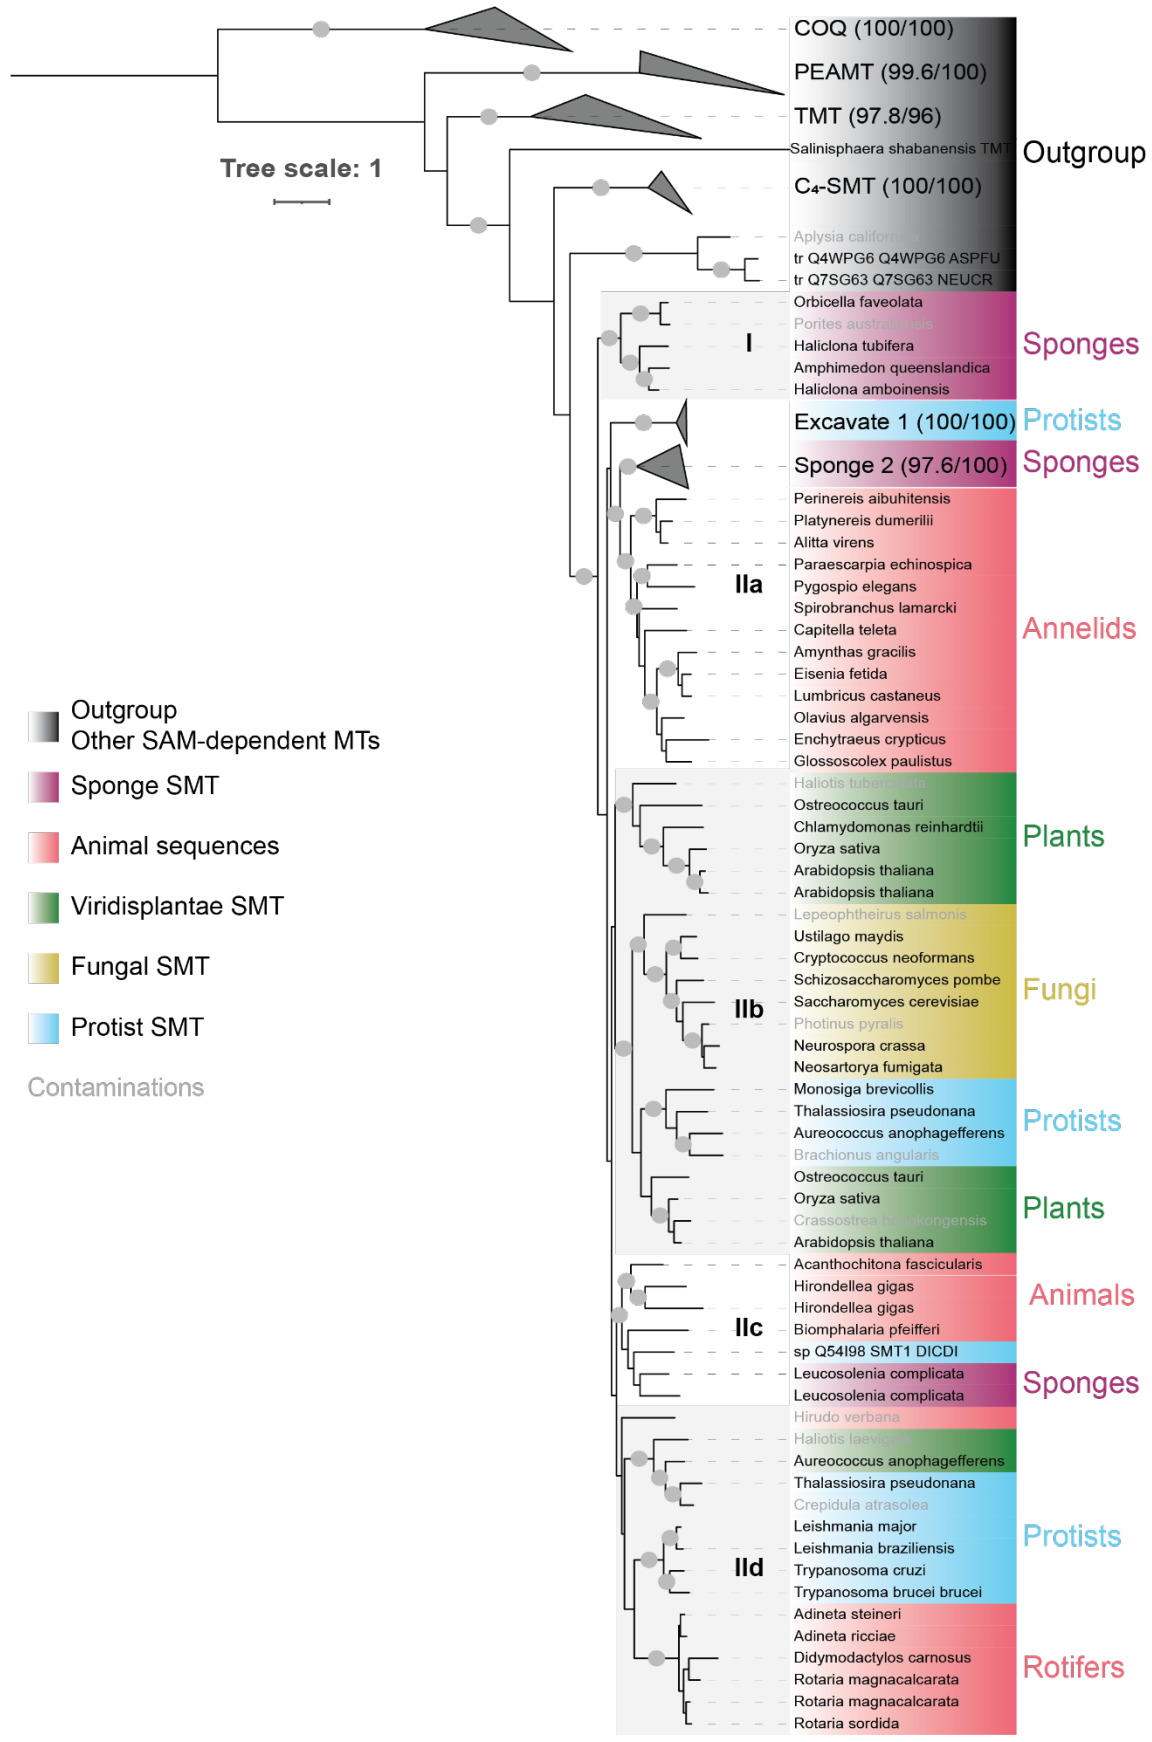

**Supplementary Figure 22 | Most C-24 sterol methyltransferase (C<sub>24</sub>-SMT) homologues identified by BLAST within mollusks, chordata and nematode phyla were plant, protist or fungal contaminations, or belonged to the C<sub>4</sub>-SMT, an SMT specific to nematodes.** Maximum likelihood amino acid tree of SMTs, with other SAM-dependent methyltransferases used as outgroups. Bootstrap values  $\geq 90\%$  are marked with a grey circle. The bootstrap value and branch support value are indicated in brackets for collapsed groups. Animal sequences identified as contamination are labelled in grey. The tree was rooted at midpoint in iTOL. Ubiquinone biosynthesis O-methyltransferase (COQ), phosphoethanolamine N-methyltransferase (PEAMT), tocopherol O-methyltransferase (TMT), C-4 sterol methyltransferase (C<sub>4</sub>-SMT).

**Supplementary Table 1 | List of sterols detected by MALDI-2-MSI in *Olavius algarvensis*.**

| Sterol       | Sum formula                       | Molecular weight M (calc) | [M-H <sub>2</sub> O+H] <sup>+</sup> (calc) | [M-H <sub>2</sub> O+H] <sup>+</sup> (exp) | Mass error (ppm) |
|--------------|-----------------------------------|---------------------------|--------------------------------------------|-------------------------------------------|------------------|
| cholesterol  | C <sub>27</sub> H <sub>46</sub> O | 386.355                   | 369.352                                    | 369.345                                   | 19               |
| sitosterol   | C <sub>29</sub> H <sub>50</sub> O | 414.386                   | 397.383                                    | 397.376                                   | 18               |
| stigmasterol | C <sub>29</sub> H <sub>48</sub> O | 412.371                   | 395.368                                    | 395.364                                   | 10               |

**Supplementary Table 2 | List of the enzymes involved in sterol biosynthetic pathway in eukaryotic model organisms.**

| Enzymatic reaction                    | E.C number                | Animal  | Plant          | Fungi |
|---------------------------------------|---------------------------|---------|----------------|-------|
| Squalene monooxygenation              | 1.14.14.17                | SQE     | SQE            | ERG1  |
| Oxydosqualene cyclization             | 5.4.99.7 and 5.4.99.8     | LAS     | CAS            | ERG7  |
| C-14 demethylation                    | 1.14.14.154               | CYP51   | CYP51G1        | ERG11 |
| C-14 reduction                        | 1.3.1.70                  | LBR     | FK             | ERG24 |
| C-4 demethylation                     | 1.14.18.9 /10 /11         | MSMO1   | SMO            | ERG25 |
|                                       | 1.1.1.170 and 1.1.1.418   | NSDHL   | 3 $\beta$ -HSD | ERG26 |
|                                       | 1.1.1.270                 | HSD17B7 | ?              | ERG27 |
| $\Delta 7$ - $\Delta 8$ isomerization | 5.-.- and 5.3.3.5         | EBP     | HYD1           | ERG2  |
| C-5 desaturation                      | 1.14.19.20 and 1.14.21.6  | SC5DL   | DWF7           | ERG3  |
| $\Delta 7$ reduction                  | 1.3.1.21                  | DHCR7   | DWF5           | n.d.  |
| $\Delta 24$ reduction                 | 1.3.1.71/72 and 1.3.1.M20 | DHCR24  | DIM            | ERG4  |
| C-22 desaturation                     | 1.14.19.41                | n.d.    | CYP710A        | ERG5  |
| C-24 and C-28 methylation             | 2.1.1.41 and 2.1.1.143    | n.d.    | SMT            | ERG6  |
| Cyclopropylsterol isomerization       | 5.5.1.9                   | n.d.    | CPI            | n.d.  |

**Supplementary Table 3 | Detection of enzymes involved in sterol biosynthesis in the draft genome of *Olavius algarvensis*.**

| Enzyme  | Target                  | Contig        | Status                | Reasons                        | Matches | Mismatch | ID   | Coverage | Score | # of exons |
|---------|-------------------------|---------------|-----------------------|--------------------------------|---------|----------|------|----------|-------|------------|
| SQE     | 4410_host_Oalg_flye-2.8 | contig_6471   | incomplete            | missing stopcodon + missmatch  | 515     | 3        | 99.4 | 100      | 0.988 | 9          |
| LAS     | 4410_host_Oalg_flye-2.8 | contig_13849  | auto                  | -                              | 756     | 0        | 100  | 100      | 1     | 20         |
| CYP51   | 4410_host_Oalg_flye-2.8 | contig_37932  | incomplete            | mismatches                     | 504     | 2        | 99.6 | 100      | 0.992 | 11         |
| CYP51   | 4410_host_Oalg_flye-2.8 | contig_37932  | incomplete            | mismatches                     | 319     | 2        | 99.4 | 100      | 0.988 | 6          |
| LBR     | 4410_host_Oalg_flye-2.8 | contig_20025  | partial 1-21 (#1/2)   | -                              | 21      | 0        | 100  | 3.6      | 0.036 | 1          |
| LBR     | 4410_host_Oalg_flye-2.8 | contig_42201  | partial 22-583 (#2/2) | -                              | 555     | 7        | 98.8 | 100      | 0.94  | 10         |
| MSMO1   | 4410_host_Oalg_flye-2.8 | contig_24678  | incomplete            | gap to querystart (7-306)      | 300     | 0        | NA   | NA       | 0.98  | 6          |
| NSDHL   | 4410_host_Oalg_flye-2.8 | contig_27038  | auto                  | -                              | 346     | 0        | 100  | 100      | 1     | 7          |
| HSD17B7 | 4410_host_Oalg_flye-2.8 | contig_21098  | partial 1-27 (#1/2)   | -                              | 27      | 0        | NA   | NA       | 0.079 | 1          |
| HSD17B7 | 4410_host_Oalg_flye-2.8 | contig_21097  | partial 18-343 (#2/2) | mismatches + missing stopcodon | 312     | 4        | 98.7 | 100      | 0.898 | 9          |
| EBP     | 4410_host_Oalg_flye-2.8 | contig_10005  | auto                  | -                              | 230     | 0        | 100  | 100      | 1     | 3          |
| SC5DL   | 4410_host_Oalg_flye-2.8 | contig_6195   | incomplete            | missing stopcodon              | 282     | 0        | 100  | 100      | 1     | 3          |
| DHCR7   | 4410_host_Oalg_flye-2.8 | Contig_8717   | incomplete            | missing stopcodon + missmatch  | 482     | 1        | 99.8 | 100      | 0.996 | 3          |
| DHCR24  | 4410_host_Oalg_flye-2.8 | scaffold_4022 | incomplete            | missing stopcodon + missmatch  | 501     | 2        | 99.6 | 100      | 0.992 | 8          |
| SMT     | 4410_host_Oalg_flye-2.8 | contig_41985  | incomplete            | missing stopcodon              | 165     | 0        | 100  | 100      | 1     | 4          |

**Supplementary Table 4 | Detection of enzymes involved in sterol biosynthesis in the transcriptome of *Olavius algarvensis*.**

| Enzyme_ID                   | Contig                    | Query                 | ID (%) | length | evalue    | bitscore | assembly |
|-----------------------------|---------------------------|-----------------------|--------|--------|-----------|----------|----------|
| ERG7                        | TRINITY_DN47299_c3_g1_i19 | sp Q8BLN5 ERG7_MOUSE  | 61.165 | 721    | 0         | 894      | Oalg5ASA |
| ERG6                        | TRINITY_DN46293_c3_g7_i1  | sp Q9LM02 SMT1_ARATH  | 49.158 | 297    | 8.50E-100 | 297      | OalgA5SA |
| ERG11                       | TRINITY_DN47328_c5_g2_i2  | sp Q1JPY5 CYP51_DANRE | 69.892 | 465    | 0         | 672      | OalgA5SA |
| ERG1                        | TRINITY_DN49356_c3_g8_i1  | sp Q14534 ERG1_HUMAN  | 59.346 | 428    | 0         | 530      | OalgA5SA |
| ERG26                       | TRINITY_DN40078_c3_g2_i1  | sp Q3ZBE9 NSDHL_BOVIN | 60.117 | 341    | 1.02E-155 | 434      | OalgB8SA |
| ERG27                       | TRINITY_DN48078_c2_g1_i1  | sp Q62904 DHB7_RAT    | 50     | 268    | 2.16E-83  | 251      | OalgA5SA |
| ERG24                       | TRINITY_DN29949_c0_g1_i1  | sp Q14739 LBR_HUMAN   | 49.745 | 392    | 6.70E-137 | 397      | OalgB8SA |
| ERG25                       | TRINITY_DN35202_c6_g4_i2  | sp Q5ZLL6 MSMO1_CHICK | 64.789 | 284    | 6.74E-133 | 375      | OalgA8SA |
| partial_ERG3                | TRINITY_DN35917_c0_g1_i2  | sp O75845 SC5D_HUMAN  | 63.592 | 206    | 6.76E-101 | 301      | OalgB5SA |
| ERG2                        | TRINITY_DN18361_c0_g1_i2  | sp P70245 EBP_MOUSE   | 45.249 | 221    | 3.50E-72  | 216      | verC3    |
| DHCR7a                      | TRINITY_DN28908_c0_g1_i1  | sp Q9LDU6 ST7R_ARATH  | 48.921 | 417    | 7.72E-137 | 394      | 4731     |
| DHCR24_4731_Verc3_consensus |                           |                       |        |        |           |          |          |
| partial_DHCR24              | TRINITY_DN23155_c0_g1_i1  | sp Q5BQE6 DHC24_RAT   | 63.725 | 408    | 0         | 574      | 4731     |
| partial_DHCR24              | TRINITY_DN35798_c0_g2_i2  | sp Q5BQE6 DHC24_RAT   | 63.006 | 346    | 5.28E-175 | 488      | verC3    |

**Supplementary Table 5 | Detection of enzymes involved in sterol biosynthesis in the proteome of *Olavius algarvensis*.** FDR = False discovery rate, #PSMs = number of peptide spectral matches, #PUPs = number of protein unique peptides.

| Protein accession                    | Description                                | Found in proteome (filtered for 5% FDR) | Found in # of samples (out of 25) | q-value | #PSMs | #of PUP |
|--------------------------------------|--------------------------------------------|-----------------------------------------|-----------------------------------|---------|-------|---------|
| ERG1_Host_330784_c8_seq1_40          | squalene monooxygenase homologue           | No                                      | -                                 | -       | -     | -       |
| ERG2_Host_282622_c0_seq2_5           | sterol C-8 isomerase homologue             | Yes                                     | 4                                 | 0.008   | 4     | 0       |
| ERG6_Host_316125_c3_seq1_6           | sterol methyltransferase homologue         | Yes                                     | 25                                | 0       | 70    | 4       |
| ERG7_Host_333294_c4_seq2_44          | lanosterol synthase homologue              | Yes                                     | 3                                 | 0       | 4     | 2       |
| ERG11a_Host_334930_c0_seq4_30        | sterol C-14 demethylase homologue          | Yes                                     | 25                                | 0       | 50    | 1       |
| ERG11b_Host_334930_c0_seq1_24        | sterol C-14 demethylase homologue          | Yes                                     | 12                                | 0       | 16    | 0       |
| ERG24_Host_331074_c0_seq1_34         | sterol C-14 reductase homologue            | Yes                                     | 25                                | 0       | 123   | 5       |
| ERG25_Host_335885_c4_seq2_8          | methylsterol monooxygenase homologue       | No                                      | -                                 | -       | -     | -       |
| ERG26a_Host_330893_c3_seq7_9         | Sterol-4-alpha-carboxylate 3-dehydrogenase | Yes                                     | 17                                | 0       | 25    | 1       |
| ERG27_Host_329156_c0_seq5_38         | 3-keto reductase homologue                 | No                                      | -                                 | -       | -     | -       |
| ERG3_Host_326988_c0_seq1_35          | sterol C-5 desaturase homologue            | No                                      | -                                 | -       | -     | -       |
| DHCR24_4731_Verc3_consensus          | sterol C-24 reductase homologue            | No                                      | -                                 | -       | -     | -       |
| DHCR7a_4731_TRINITY_DN28908_c0_g1_i1 | sterol C-7 reductase homologue             | No                                      | -                                 | -       | -     | -       |

**Supplementary Table 6 | The sterol profiles of all investigated *Olavius* and *Inanidrilus* species was dominated by sitosterol.**

| Species                          | Sampling location         | Main sterol | other sterols | C <sub>24</sub> -SMT |
|----------------------------------|---------------------------|-------------|---------------|----------------------|
| <i>Olavius algarvensis</i>       | Sant'Andrea (Elba, Italy) | sitosterol  | cholesterol   | yes                  |
| <i>Olavius ilvae</i>             | Sant'Andrea (Elba, Italy) | sitosterol  | cholesterol   | yes                  |
| <i>Olavius algarvensis</i>       | Magaluf (Mallorca, Spain) | sitosterol  | cholesterol   | yes                  |
| <i>Olavius longissimus</i>       | Carrie bow Cay (Belize)   | sitosterol  | cholesterol   | yes                  |
| <i>Olavius tantulus</i>          | Twin Cayes (Belize)       | sitosterol  | cholesterol   | yes                  |
| <i>Inanidrilus mojicae</i>       | Twin Cayes (Belize)       | sitosterol  | cholesterol   | unknown              |
| <i>Inanidrilus leukodermatus</i> | Carrie bow Cay (Belize)   | sitosterol  | cholesterol   | yes                  |
| <i>Olavius sp.</i>               | Okinawa (Japan)           | sitosterol  | cholesterol   | yes                  |

**Supplementary Table 7 | C<sub>24</sub>-SMT homologues were identified in the transcriptomes of all *Olavius* and *Inanidrilus* species analyzed in this study**

| Species                          | Collection site            | C <sub>24</sub> -SMT | Target_ID       | Type                |
|----------------------------------|----------------------------|----------------------|-----------------|---------------------|
| <i>Inanidrilus leukodermatus</i> | Harrington Sound (Bermuda) | yes                  | TRINITY_DN9622  | transcript          |
| <i>Inanidrilus sp.</i> FANTCC3   | Curlew Cay (Belize)        | yes                  | TRINITY_DN8118  | transcript          |
| <i>Inanidrilus sp.</i> NYSP      | Carrie Bow Caye (Belize)   | yes                  | TRINITY_DN8686  | transcript          |
| <i>Inanidrilus sp.</i> ULE       | Curlew Cay (Belize)        | yes                  | TRINITY_DN41110 | transcript          |
| <i>Olavius clavatus</i>          | Lizard Island (Australia)  | yes                  | g641.t1         | gene                |
| <i>Olavius finitimus</i>         | Twin Cayes (Belize)        | yes                  | TRINITY_DN10503 | transcript          |
| <i>Olavius ilvae</i>             | Sant'Andrea (Elba, Italy)  | yes                  | TRINITY_DN18930 | transcript and gene |
| <i>Olavius imperfectus</i>       | Twin Cayes (Belize)        | yes                  | TRINITY_DN8834  | transcript          |
| <i>Olavius tantalus</i>          | Twin Cayes (Belize)        | yes                  | TRINITY_DN12053 | transcript          |

**Supplementary Table 8 | C<sub>24</sub>-SMT homologues are widely spread in annelids.** They were found in the transcriptomes of 9 *Olavius* and *Inanidrilus* species, in three deep-sea gutless tubeworm species and 17 gut-bearing annelid species from marine, limnic and terrestrial environments belonging to six different clades. Methylated sterols (C<sub>28</sub> and C<sub>29</sub>) often account for an important part of the sterol profile of annelids. References: 1 (Voogt, 1973b), 2 (Voogt, 1973c), 3 (Marsh et al., 1990), 4 (McLaughlin, 1971b), 5 (Petersen & Holmstrup, 2000), 6 (Hasan et al., 2012), 7 (Zipser et al., 1998), 8 (Naya & Kotake, 1967), 9 (Cerbulis & Wight Taylor, 1969), 10 (Albro et al., 1993), 11 (Mita et al., 2006), 12 (Guan et al., 2021), 13 (Kobayashi et al., 1973), 14 (Phleger et al., 2005), 15 (Rieley et al., 1996).  
→ See attached excel file

**Supplementary Table 9 | C<sub>24</sub>-SMT homologues are also present in sponges, rotifers and likely in mollusks.**  
→ See attached excel file

**Supplementary Table 10 | Solvent gradient for high-resolution LC-MS/MS with a C30 column used to identify sterols.**

| <b>%B</b> | <b>Time (min)</b>          |
|-----------|----------------------------|
| 0         | -2 (pre-run equilibration) |
| 0         | 2                          |
| 16        | 5.5                        |
| 45        | 9                          |
| 52        | 12                         |
| 58        | 14                         |
| 66        | 16                         |
| 70        | 18                         |
| 75        | 22                         |
| 97        | 25                         |
| 97        | 32.5                       |
| 15        | 33                         |
| 0         | 34.4                       |
| 0         | 36                         |

Buffer A (60/40 ACN/H<sub>2</sub>O, 10 mM ammonium formate, 0.1% FA) and Buffer B (90/10 IPA/ACN, 10 mM ammonium formate, 0.1% FA) were used at a flow rate of 350  $\mu\text{l min}^{-1}$

**Supplementary Table 11 | MS settings of the Q Exactive Plus Orbitrap (Thermo Fisher Scientific) equipped with a HESI probe and a Vanquish Horizon UHPLC System (Thermo Fisher Scientific).**

| <b>MS<sup>1</sup></b>         | <b>C30 settings</b> | <b>C18 settings</b> |
|-------------------------------|---------------------|---------------------|
| Resolution                    | 70,000              | 70,000              |
| AGC target                    | 5e5                 | 3e6                 |
| Max IT [ms]                   | 65                  | 200                 |
| Scan range [ <i>m/z</i> ]     | 150–1500            | 100–1000            |
| <b>MS<sup>2</sup></b>         | <b>DDA</b>          | <b>DIA</b>          |
| Resolution                    | 35,000              | 35,000              |
| AGC target                    | 1e6                 | 2e5                 |
| Max IT [ms]                   | 75                  | auto                |
| Loop count                    | 8                   | 1                   |
| Dynamic exclusion [sec.]      | 30                  | NA                  |
| Isolation windows (pos.) [Da] | 1                   | 0.4                 |
| Isolation windows (neg.) [Da] | 1                   | NA                  |
| NCE                           | 30                  | 30                  |

**Supplementary Table 12 | List of the enzymes isolated from model organisms used as query to assess the ability of gutless annelids to synthesize sterols.**

| <b>Enzyme_name</b>                         | <b>animal</b>    | <b>plant</b>                                   | <b>fungi</b> |
|--------------------------------------------|------------------|------------------------------------------------|--------------|
| <b>SQE/ERG1</b>                            | Q14534           | Q9SM02                                         | Q92206       |
| <b>LAS/CAS/ERG7</b>                        | P48449           | P38605                                         | P38604       |
| <b>CYP51/ERG11</b>                         | Q16850           | Q9SAA9                                         | P10614       |
| <b>LBR/FK/ERG24</b>                        | O76062<br>Q14739 | P32462                                         | Q9LDR4       |
| <b>MSMO1/SMO/ERG25</b>                     | Q15800           | Q8L7W5<br>Q1EC69<br>Q9ZW22<br>Q8VWZ8<br>F4JLZ6 | O59933       |
| <b>NSDHL/3<math>\beta</math>-HSD/ERG26</b> | Q15738           | A9X4U2<br>Q67ZE1<br>Q9FX01                     | P53199       |
| <b>HSD17B7/?/ERG27</b>                     | P56937           | -                                              | Q12452       |
| <b>EBP/HYD1/ERG2</b>                       | Q15125           | O48962                                         | P32352       |
| <b>SC5DL/DWF7/ERG3</b>                     | O75845           | Q39208<br>Q9M883                               | P32353       |
| <b>DHCR7/DWF5/-</b>                        | Q9UBM7           | Q9LDU6                                         | -            |
| <b>DHCR24/DIM/ERG4</b>                     | Q15392           | Q39085                                         | P25340       |
| <b>-/CYP710A/ERG5</b>                      | -                | O64697<br>O64698<br>Q9ZV28<br>Q9ZV29           | P54781       |
| <b>-/SMT/ERG6</b>                          | -                | Q9LM02<br>Q39227<br>Q94JS4                     | P25087       |
| <b>-/CPI/-</b>                             | -                | Q9M643                                         | -            |



**Supplementary Table 13 | Details of the sequences, plasmid, and *E. coli* cells used for the heterologous gene expression experiments.**

| Gene Name        | Sequence                                                                                                                                                                                                                                                                                                                                                                                                       | Length  | Restriction Sites to Keep | Cloning Vector                                 | Comment                              | Expression host              | ID     |
|------------------|----------------------------------------------------------------------------------------------------------------------------------------------------------------------------------------------------------------------------------------------------------------------------------------------------------------------------------------------------------------------------------------------------------------|---------|---------------------------|------------------------------------------------|--------------------------------------|------------------------------|--------|
| AraTh_Q9LM02     | MDLASNLGGKIDKSDVLTAVEKEYEQYHVF<br>HGGNEEERKANYTDMVNKYDLATSFYE<br>YGWGESFHFAQRWKGESLRESIKRHEHF<br>LALQLGIPGQKVLVDVGCIGGPLREIARFS<br>NSVVTGLNNNEYQITRGKELNRLAGVDKT<br>CNFVKADFMMPPFENSFDAVYAIEATCHA<br>PDAYGCVKEIYRVLKPGQCFAAYEWCMT<br>DAFDPDNAEHQKIGEIEIGDGLPDIRLTTK<br>LEALKQAGFEVIWEKDLAKDSPVPWYLP<br>LAPQGSQQRVSNFLEQAAEGDGRREIFT<br>PMYFFLARKPE                                                             | 1023 bp | NheI/XhoI                 | pET-28a(+) with restriction sites<br>NheI/XhoI | His- Tag at the N-terminal side only | <i>E. coli</i> C41(DE3)pLysS | T-3784 |
| OclaLIZ1_g641.t1 | MTSVEKPSITEILRPLQAKSPSSVESTADG<br>YLRYFEREQQSKDDKVDEEDLDAEATDR<br>RRQDAVTVTNAYYDLATDFYEWGDFH<br>FAVLKPEESREHSFAKHEYFLAMKLGKKA<br>GDTVLDIGCGIGGPARHIASLSEANVIGMN<br>INDYQLSRARILTEKAKLDHLCFVKADYN<br>HMPYGDGHFDVYAIEATCHSPTLLSVYSE<br>VFRVLKPGGMFAVYEWIMTDKYNPTDPY<br>HKKLKADILEGDGLPDIPTAPQAWAARQA<br>GFEVLESRDRALEPGLPWNVLQARWTL<br>DIKITPLGRWATHVMLAVLETVHLAPRGAV<br>KVHRTLCKGADALAAAGVEGIFSPMYLLV<br>LRKPRD | 1089 bp | NheI/XhoI                 | pET-28a(+) with restriction sites<br>NheI/XhoI | His- Tag at the N-terminal side only | <i>E. coli</i> Lemo21(DE3)   | T-3787 |
| OalgB8SA         | MNSIEKPSITGILRPLHGKAAVESTADGYL<br>RYFSDSPPRDDAADADDSDAEAVERRR<br>KNALAVTNAYYDLATDFYEWGEAFHFA<br>VLKPEESREHSFAKHEYFLGMKLGKAGD<br>TVLDIGCGIGGPARHIASLSEANVIGLNIND<br>YQLSRARILTEKAKLDHLCFVKADYNHMP<br>YGEHFHDKVYAIEATCHSPSLCSVYSEVF<br>RVLKPGGLFALYEWIMTDYNTDPYHKK<br>LKADILEGDGLPDLASVPQVLTAAQAGF<br>EVVESRDRALEPGVPWYTVLQARWTLSDI<br>KITPFGRWATHVMLAVLETVRLAPRGSVK<br>VHRTLCKGADALAAAGAEGIFSPMYLLV<br>RKPSK    |         | NheI/XhoI                 | pET-28a(+) with restriction sites<br>NheI/XhoI | His- Tag at the N-terminal side only | <i>E. coli</i> Lemo21(DE3)   | T-3909 |

**Supplementary Table 14 | List of the different sterol substrates tested with the animal C<sub>24</sub>-SMTs.** *Olavius algarvensis* C<sub>24</sub>-SMT (Oalg\_SMT), *Olavius clavatus* C<sub>24</sub>-SMT (Oclav\_SMT) and *Arabidopsis thaliana* C<sub>24</sub>-SMT (Atha\_SMT1). Green shading indicates that the substrate can be used by the enzyme tested. Orange shading indicates that no methylated product was detected at the end of the incubation between the set of enzyme and the substrate tested.

| Substrate                | Enzyme                      |                             |                             | Rationale for testing the substrate                                     |
|--------------------------|-----------------------------|-----------------------------|-----------------------------|-------------------------------------------------------------------------|
|                          | Oalg_SMT                    | Oclav_SMT                   | Atha_SMT1                   |                                                                         |
| Lathosterol              |                             |                             |                             | Cholesterol intermediate                                                |
| 7-dehydrocholesterol     |                             |                             |                             | Cholesterol intermediate                                                |
| Desmosterol              | 1 <sup>st</sup> methylation | 1 <sup>st</sup> methylation |                             | Cholesterol intermediate                                                |
| Cholesterol              |                             |                             |                             | Cholesterol intermediate                                                |
| Zymosterol               | 1 <sup>st</sup> methylation | 1 <sup>st</sup> methylation |                             | Substrate of fungal C <sub>24</sub> -SMT and cholesterol intermediate   |
| Fecosterol               |                             |                             |                             | (Ganapathy et al., 2008)                                                |
| Eburicol                 |                             |                             |                             | <i>Pneumocystis carinii</i> , substrate for 2 <sup>nd</sup> methylation |
| Lanosterol               |                             |                             |                             | Substrate of fungal C <sub>24</sub> -SMT                                |
| Cycloartenol             |                             |                             | 1 <sup>st</sup> methylation | Substrate of the first methylation in plants                            |
| Campesterol              |                             |                             |                             | Potential intermediate of <i>O. algarvensis</i> sitosterol biosynthesis |
| 24-methylene-cholesterol | 2 <sup>nd</sup> methylation | 2 <sup>nd</sup> methylation |                             | Potential intermediate of <i>O. algarvensis</i> sitosterol biosynthesis |

**Supplementary Table 15 | Solvent gradient for high-resolution LC-MS/MS with C18 column.**

| %B   | Time (min)                  |
|------|-----------------------------|
| 50   | -10 (pre-run equilibration) |
| 50   | 3                           |
| 87.5 | 9                           |
| 90   | 15                          |
| 100  | 21                          |
| 100  | 30                          |
| 50   | 32                          |

Solvent A (MiliQ, 0.1% FA) and Solvent B (90:10 ACN:MiliQ, 0.1% FA) were used at a flow rate of 200  $\mu\text{l min}^{-1}$ .

# References

- Albro, P. W., Corbett, J. T., & Schroeder, J. L. (1993). Endogenous lipids of the earthworm *Lumbricus terrestris*. *Biochemistry and Cell Biology*, 71(3–4), 220–221. <https://doi.org/10.1139/o93-033>
- Ballantine, J. A., Lavis, A., Roberts, J. C., Morris, R. J., Elsworth, J. F., & Cragg, G. M. L. (1978). Marine sterols—VII. The sterol compositions of oceanic and coastal marine annelida species. *Comparative Biochemistry and Physiology Part B: Comparative Biochemistry*, 61(1), 43–47. [https://doi.org/10.1016/0305-0491\(78\)90211-0](https://doi.org/10.1016/0305-0491(78)90211-0)
- Canuel, E. A., Freeman, K. H., & Wakeham, S. G. (1997). Isotopic compositions of lipid biomarker compounds in estuarine plants and surface sediments. *Limnology and Oceanography*, 42(7), 1570–1583. <https://doi.org/10.4319/lo.1997.42.7.1570>
- Carvalho, M., Schwudke, D., Sampaio, J. L., Palm, W., Riezman, I., Dey, G., Gupta, G. D., Mayor, S., Riezman, H., Shevchenko, A., Kurzchalia, T. V., & Eaton, S. (2010). Survival strategies of a sterol auxotroph. *Development*, 137(21), 3675–3685. <https://doi.org/10.1242/dev.044560>
- Cerbulis, J., & Wight Taylor, M. (1969). Neutral lipid and fatty acid composition of earthworms (*Lumbricus terrestris*). *Lipids*, 4(5), 363–368. <https://doi.org/10.1007/BF02531007>
- Cooper, L., & DeNiro, M. (1989). Stable carbon isotope variability in the seagrass *Posidonia oceanica*: Evidence for light intensity effects. *Marine Ecology Progress Series*, 50, 225–229. <https://doi.org/10.3354/meps050225>
- Dauby, P. (1989). The stable carbon isotope ratios in benthic food webs of the gulf of Calvi, Corsica. *Continental Shelf Research*, 9(2), 181–195. [https://doi.org/10.1016/0278-4343\(89\)90091-5](https://doi.org/10.1016/0278-4343(89)90091-5)
- Dubilier, N., Blazejak, A., & Rühland, C. (2006). Symbioses between Bacteria and Gutless Marine Oligochaetes. In J. Overmann (Ed.), *Molecular Basis of Symbiosis* (pp. 251–275). Springer. [https://doi.org/10.1007/3-540-28221-1\\_12](https://doi.org/10.1007/3-540-28221-1_12)
- Fry, B., Scalan, R. S., & Parker, P. L. (1983).  $^{13}\text{C}/^{12}\text{C}$  ratios in marine food webs of the Torres Strait, Queensland. *Marine and Freshwater Research*, 34(5), 707–715. <https://doi.org/10.1071/mf9830707>
- Ganapathy, K., Jones, C. W., Stephens, C. M., Vatsyayan, R., Marshall, J. A., & Nes, W. D. (2008). Molecular probing of the *Saccharomyces cerevisiae* sterol 24-C methyltransferase reveals multiple amino acid residues involved with C2-transfer activity. *Biochimica et Biophysica Acta (BBA) - Molecular and Cell Biology of Lipids*, 1781(6), 344–351. <https://doi.org/10.1016/j.bbalip.2008.04.015>
- Guan, H., Birgel, D., Feng, D., Peckmann, J., Liu, L., Liu, L., & Tao, J. (2021). Lipids and their  $\delta^{13}\text{C}$  values reveal carbon assimilation and cycling in the methane-seep tubeworm *Paraescarpia echinospica* from the South China Sea. *Deep Sea Research Part I: Oceanographic Research Papers*, 174, 103556. <https://doi.org/10.1016/j.dsr.2021.103556>
- Hasan, F., Khar, R. K., Ahmad, F. J., Ahmad, S., Ali, M., Iqbal, Z., & Reza, M. H. (2012). Development and Validation of a Stability-Indicating Method for Determination of Free

- Sterols in the Asian Medicinal Leech *Hirudo manillensis*. *Journal of Chromatographic Science*, 50(8), 673–679. <https://doi.org/10.1093/chromsci/bms076>
- Jennings, S., Reñones, O., Morales-Nin, B., Polunin, N., Moranta, J., & Coll, J. (1997). Spatial variation in the 15N and 13C stable isotope composition of plants, invertebrates and fishes on Mediterranean reefs: Implications for the study of trophic pathways. *Marine Ecology Progress Series*, 146, 109–116. <https://doi.org/10.3354/meps146109>
- Kobayashi, M., Nishizawa, M., Todo, K., & Mitsuhashi, H. (1973). Marine Sterols. I. Sterols of Annelida, *Pseudopotamilla ocellata* MOORE. *Chemical & Pharmaceutical Bulletin*, 21(2), 323–328. <https://doi.org/10.1248/cpb.21.323>
- Lepoint, G., Dauby, P., & Gobert, S. (2004). Applications of C and N stable isotopes to ecological and environmental studies in seagrass ecosystems. *Marine Pollution Bulletin*, 49(11), 887–891. <https://doi.org/10.1016/j.marpolbul.2004.07.005>
- Lu, N. C., Newton, C., & Stokstad, E. L. R. (1977). The Requirement of Sterol and Various Sterol Precursors in Free-Living Nematodes. *Nematologica*, 23(1), 57–61. <https://doi.org/10.1163/187529277X00228>
- Marsh, A. G., Harvey, H. R., Grémare, A., & Tenore, K. R. (1990). Dietary effects on oocyte yolk-composition in *Capitella* sp. I (Annelida: Polychaeta): Fatty acids and sterols. *Marine Biology*, 106(3), 369–374. <https://doi.org/10.1007/BF01344314>
- McLaughlin, J. (1971a). Biochemical studies on *Eisenia foetida* (savigny, 1826), the brandling worm—I. Tissue lipids and sterols. *Comparative Biochemistry and Physiology Part B: Comparative Biochemistry*, 38(1), 147–163. [https://doi.org/10.1016/0305-0491\(71\)90294-X](https://doi.org/10.1016/0305-0491(71)90294-X)
- McLaughlin, J. (1971b). Biochemical studies on *Eisenia foetida* (savigny, 1826), the brandling worm—I. Tissue lipids and sterols. *Comparative Biochemistry and Physiology Part B: Comparative Biochemistry*, 38(1), 147–163. [https://doi.org/10.1016/0305-0491\(71\)90294-X](https://doi.org/10.1016/0305-0491(71)90294-X)
- McMillan, C., Parker, P. L., & Fry, B. (1980). 13C/12C ratios in seagrasses. *Aquatic Botany*, 9, 237–249. [https://doi.org/10.1016/0304-3770\(80\)90025-X](https://doi.org/10.1016/0304-3770(80)90025-X)
- Meyer, H., Provasoli, L., & Meyer, F. (1979). Lipid biosynthesis in the marine flatworm *Convoluta roscoffensis* and its algal symbiont *Platymonas convoluta*. *Biochimica Et Biophysica Acta*, 573(3), 464–480. [https://doi.org/10.1016/0005-2760\(79\)90221-2](https://doi.org/10.1016/0005-2760(79)90221-2)
- Mita, M., Deguchi, M., & Sasayama, Y. (2006). Lipid composition of the trophosome in the beard worm, *Oligobranchia mashikoi* (Pogonophora). *Journal of the Marine Biological Association of the United Kingdom*, 86(2), 283–286. <https://doi.org/10.1017/S0025315406013130>
- Naya, Y., & Kotake, M. (1967). [Study of free fatty acids, free sterols, sterolester and glyceride in the earthworm (*Lumbricus spencer*)]. *Bulletin of the Chemical Society of Japan*, 40(4), 880–884.
- Oh, K. H., Haney, J. J., Wang, X., Chuang, C.-F., Richmond, J. E., & Kim, H. (2017). ERG-28 controls BK channel trafficking in the ER to regulate synaptic function and alcohol response in *C. elegans*. *ELife*, 6, e24733. <https://doi.org/10.7554/eLife.24733>
- Petersen, S. O., & Holmstrup, M. (2000). Temperature effects on lipid composition of the earthworms *Lumbricus rubellus* and *Eisenia nordenskiöldi*. *Soil Biology and Biochemistry*, 32(11), 1787–1791. [https://doi.org/10.1016/S0038-0717\(00\)00059-6](https://doi.org/10.1016/S0038-0717(00)00059-6)

- Phleger, C. F., Nelson, M. M., Groce, A. K., Cary, S. C., Coyne, K. J., & Nichols, P. D. (2005). Lipid composition of deep-sea hydrothermal vent tubeworm *Riftia pachyptila*, crabs *Munidopsis subsquamosa* and *Bythograea thermydron*, mussels *Bathymodiolus* sp. And limpets *Lepetodrilus* spp. *Comparative Biochemistry and Physiology Part B: Biochemistry and Molecular Biology*, 141(2), 196–210. <https://doi.org/10.1016/j.cbpc.2005.03.001>
- Pinnegar, J. K., & Polunin, N. V. C. (2000). Contributions of stable-isotope data to elucidating food webs of Mediterranean rocky littoral fishes. *Oecologia*, 122(3), 399–409. <https://doi.org/10.1007/s004420050046>
- Rieley, G., Dover, C. L. V., Hedrick, D. B., White, D. C., & Eglinton, G. (1996). Lipid characteristics of hydrothermal vent organisms from 9°N, East Pacific Rise. *Oceanographic Literature Review*, 2(43), 133–134.
- Shamsuzzama, Lebedev, R., Trabelcy, B., Langier Goncalves, I., Gerchman, Y., & Sapir, A. (2020). Metabolic Reconfiguration in *C. elegans* Suggests a Pathway for Widespread Sterol Auxotrophy in the Animal Kingdom. *Current Biology*, 30(15), 3031-3038.e7. <https://doi.org/10.1016/j.cub.2020.05.070>
- Sogin, E. M., Michellod, D., Gruber-Vodicka, H., Bourceau, P., Geier, B., Meier, D. V., Seidel, M., Ahmerkamp, S., Schorn, S., D'Angelo, G., Procaccini, G., Dubilier, N., & Liebeke, M. (2021). Sugars dominate the seagrass rhizosphere. *BioRxiv*, 797522. <https://doi.org/10.1101/797522>
- Thayer, G. W., Parker, P. L., LaCroix, M. W., & Fry, B. (1978). The stable carbon isotope ratio of some components of an eelgrass, *Zostera marina*, bed. *Oecologia*, 35(1), 1–12. <https://doi.org/10.1007/BF00345537>
- Vives-Peris, V., de Ollas, C., Gómez-Cadenas, A., & Pérez-Clemente, R. M. (2020). Root exudates: From plant to rhizosphere and beyond. *Plant Cell Reports*, 39(1), 3–17. <https://doi.org/10.1007/s00299-019-02447-5>
- Vizzini, S., Tomasello, A., Maida, G. D., Pirrotta, M., Mazzola, A., & Calvo, S. (2010). Effect of explosive shallow hydrothermal vents on  $\delta^{13}\text{C}$  and growth performance in the seagrass *Posidonia oceanica*. *Journal of Ecology*, 98(6), 1284–1291. <https://doi.org/10.1111/j.1365-2745.2010.01730.x>
- Voogt, P. A. (1973a). Biosynthesis and Composition of Sterols in Annelida. li. Investigations On Some Oligochaetes. *Netherlands Journal of Zoology*, 24(4), 469–478. <https://doi.org/10.1163/002829674X00200>
- Voogt, P. A. (1973b). Biosynthesis and Composition of Sterols in Annelida. li. Investigations On Some Oligochaetes. *Netherlands Journal of Zoology*, 24(4), 469–478. <https://doi.org/10.1163/002829674X00200>
- Voogt, P. A. (1973c). Biosynthesis and Composition of Sterols in Annelida—I. Investigations On Some Polychaetes. *Netherlands Journal of Zoology*, 24(1), 22–31. <https://doi.org/10.1163/002829674X00138>
- Wacker, A., & Martin-Creuzburg, D. (2012). Biochemical nutrient requirements of the rotifer *Brachionus calyciflorus*: Co-limitation by sterols and amino acids. *Functional Ecology*, 26(5), 1135–1143. <https://doi.org/10.1111/j.1365-2435.2012.02047.x>
- Wilber, C. G., & Bayors, W. M. (1947). A comparative study of the lipids in some marine annelids. *The Biological Bulletin*, 93(2), 99–101. <https://doi.org/10.2307/1538280>

Zipser, B., Bradford, J. J., & Hollingsworth, R. I. (1998). Cholesterol and its derivatives, are the principal steroids isolated from the leech species *Hirudo medicinalis*. *Comparative Biochemistry and Physiology Part C: Pharmacology, Toxicology and Endocrinology*, 120(2), 269–282. [https://doi.org/10.1016/S0742-8413\(98\)10005-1](https://doi.org/10.1016/S0742-8413(98)10005-1)
